# Supplementary material for: An activation-based high throughput screen identifies caspase-10 inhibitors
Source: Royal Society of Chemistry journal article supplement (doi:10.1039/d5cb00017c), 2025-01-01
Supplement: d5cb00017c2.xlsx [file d5cb00017c2.xlsx]

## Sheet: Summary
Tab	Description
1	Z'-factor summary for all plates and filtered plates
2	Z-score values for entire screen
3	Z-score values for re-screen plate (proCASP10)
4	Z-score values for counter screen plate (activeCASP10)
5	SMILES of hit compounds

## Sheet: Z'factor
Plate number (total screened)	Z'-factor	Average Z' (Total plates)	Average Z' (small scale screen)	Total compounds per plate	Total compounds for all plates		# plates after filtering (Z' between 0.5 and 1.0)	Filtered (0.5 - 1.0)	Average Z' (filtered)	Total compounds for filtered plates
1	0.71	0.583493	0.66625	320	120000		327	0.96	0.718716	104640
2	0.13							0.92
3	0.57							0.88
4	0.76							0.88
5	0.5							0.88
6	0.88							0.87
7	0.82							0.87
8	0.96							0.87
9	0.64							0.87
10	0.85							0.86
11	0.41							0.86
12	-0.63							0.86
13	0.59							0.86
14	0.68							0.86
15	0.7							0.85
16	0.14							0.85
17	-0.16							0.85
18	0.55							0.85
19	0.56							0.85
20	0.52							0.85
21	0.77							0.85
22	0.64							0.85
23	0.78							0.85
24	0.78							0.85
25	0.8							0.85
26	0.61							0.85
27	0.78							0.85
28	0.61							0.84
29	0.65							0.84
30	0.63							0.84
31	0.65							0.84
32	0.69							0.84
33	0.83							0.84
34	0.75							0.84
35	0.77							0.84
36	0.62							0.84
37	0.51							0.84
38	0.44							0.84
39	0.22							0.84
40	0.55							0.84
41	0.45							0.84
42	0.01							0.84
43	0.54							0.83
44	0.47							0.83
45	0.36							0.83
46	0.38							0.83
47	0.45							0.83
48	0.3							0.83
49	0.67							0.83
50	0.68							0.83
51	0.58							0.82
52	0.51							0.82
53	0.45							0.82
54	0.51							0.82
55	0.61							0.82
56	0.37							0.82
57	-1.33							0.82
58	0.31							0.82
59	0.61							0.82
60	0.65							0.81
61	0.59							0.81
62	0.45							0.81
63	0.44							0.81
64	0.53							0.81
65	0.73							0.81
66	0.32							0.81
67	0.39							0.81
68	0.63							0.81
69	0.37							0.81
70	0.72							0.81
71	0.72							0.8
72	0.45							0.8
73	0.17							0.8
74	0.19							0.8
75	-0.25							0.8
76	-12.51							0.8
77	-5.76							0.8
78	0.36							0.8
79	0.59							0.8
80	0.12							0.8
81	0.61							0.8
82	0.27							0.79
83	0.52							0.79
84	0.63							0.79
85	0.59							0.79
86	0.17							0.79
87	0.55							0.79
88	0.77							0.79
89	0.72							0.79
90	0.23							0.79
91	0.43							0.79
92	0.28							0.79
93	0.14							0.79
94	0.47							0.79
95	0.33							0.79
96	0.48							0.79
97	0.23							0.79
98	0.21							0.79
99	0.86							0.79
100	0.72							0.79
101	0.8							0.79
102	0.5							0.79
103	0.82							0.78
104	0.82							0.78
105	0.72							0.78
106	0.72							0.78
107	0.67							0.78
108	0.69							0.78
109	0.66							0.78
110	0.76							0.78
111	0.69							0.78
112	0.75							0.78
113	0.74							0.78
114	0.41							0.78
115	0.87							0.78
116	0.78							0.78
117	0.2							0.78
118	0.77							0.78
119	0.65							0.78
120	0.68							0.78
121	0.74							0.78
122	0.78							0.78
123	0.79							0.78
124	0.84							0.78
125	0.8							0.78
126	0.78							0.78
127	0.6							0.77
128	0.85							0.77
129	0.78							0.77
130	0.71							0.77
131	0.83							0.77
132	0.77							0.77
133	0.86							0.77
134	0.78							0.77
135	0.79							0.77
136	0.79							0.77
137	0.78							0.77
138	0.76							0.77
139	0.71							0.77
140	0.83							0.77
141	0.87							0.77
142	0.67							0.77
143	0.82							0.76
144	0.84							0.76
145	0.78							0.76
146	0.74							0.76
147	0.76							0.76
148	0.69							0.76
149	0.65							0.76
150	0.77							0.76
151	0.67							0.76
152	0.84							0.76
153	0.77							0.75
154	0.62							0.75
155	0.7							0.75
156	0.56							0.75
157	0.71							0.75
158	0.7							0.75
159	0.77							0.75
160	0.59							0.75
161	-1.97							0.74
162	0.66							0.74
163	0.61							0.74
164	0.47							0.74
165	-0.12							0.74
166	-0.22							0.74
167	0.69							0.74
168	0.6							0.74
169	0.72							0.74
170	0.12							0.74
171	0.69							0.74
172	0.74							0.74
173	0.74							0.74
174	0.77							0.74
175	0.72							0.73
176	0.74							0.73
177	0.74							0.73
178	0.75							0.73
179	0.72							0.72
180	0.75							0.72
181	0.72							0.72
182	0.72							0.72
183	0.65							0.72
184	0.67							0.72
185	0.74							0.72
186	0.77							0.72
187	0.79							0.72
188	0.81							0.72
189	0.72							0.72
190	0.8							0.72
191	0.82							0.72
192	0.79							0.72
193	0.74							0.72
194	0.35							0.72
195	0.78							0.72
196	0.84							0.72
197	0.85							0.72
198	0.78							0.71
199	0.78							0.71
200	0.79							0.71
201	0.8							0.71
202	0.84							0.71
203	0.7							0.71
204	0.82							0.71
205	0.85							0.71
206	0.81							0.71
207	0.84							0.7
208	0.85							0.7
209	0.86							0.7
210	0.84							0.7
211	0.85							0.7
212	0.84							0.7
213	0.86							0.7
214	0.87							0.7
215	0.83							0.7
216	0.85							0.7
217	0.85							0.7
218	0.85							0.69
219	0.85							0.69
220	0.85							0.69
221	0.82							0.69
222	0.85							0.69
223	0.7							0.69
224	0.7							0.69
225	0.79							0.69
226	0.76							0.69
227	0.52							0.69
228	0.77							0.69
229	0.79							0.68
230	0.75							0.68
231	0.79							0.68
232	0.77							0.68
233	0.81							0.68
234	0.78							0.68
235	0.81							0.67
236	0.79							0.67
237	0.81							0.67
238	0.78							0.67
239	0.8							0.67
240	0.79							0.67
241	0.79							0.67
242	0.83							0.67
243	0.78							0.67
244	-0.73							0.67
245	0.63							0.66
246	0.7							0.66
247	0.67							0.66
248	0.72							0.66
249	0.6							0.66
250	0.58							0.65
251	0.62							0.65
252	0.55							0.65
253	0.56							0.65
254	0.69							0.65
255	0.46							0.65
256	0.56							0.64
257	0.71							0.64
258	0.68							0.64
259	0.78							0.64
260	0.7							0.63
261	0.73							0.63
262	0.75							0.63
263	0.79							0.63
264	0.78							0.63
265	0.83							0.62
266	0.77							0.62
267	0.79							0.62
268	0.8							0.62
269	0.79							0.61
270	0.81							0.61
271	0.78							0.61
272	0.7							0.61
273	0.7							0.61
274	0.79							0.61
275	0.82							0.6
276	0.84							0.6
277	0.7							0.6
278	0.74							0.6
279	0.76							0.59
280	0.71							0.59
281	0.77							0.59
282	0.67							0.59
283	0.72							0.59
284	0.8							0.58
285	0.74							0.58
286	0.75							0.58
287	0.76							0.57
288	0.78							0.57
289	-0.54							0.57
290	-0.58							0.57
291	0.32							0.56
292	0.51							0.56
293	0.43							0.56
294	0.86							0.56
295	0.92							0.55
296	0.88							0.55
297	0.83							0.55
298	0.81							0.55
299	0.8							0.54
300	0.69							0.53
301	0.71							0.52
302	0.81							0.52
303	0.84							0.52
304	0.67							0.52
305	0.79							0.51
306	0.83							0.51
307	0.72							0.51
308	0.76							0.51
309	0.57							0.5
310	0.71							0.5
311	0.72							0.48
312	0.79							0.48
313	0.71							0.47
314	0.68							0.47
315	0.72							0.47
316	0.74							0.46
317	0.77							0.45
318	0.81							0.45
319	0.81							0.45
320	0.79							0.45
321	0.69							0.45
322	0.76							0.44
323	0.72							0.44
324	0.64							0.43
325	0.73							0.43
326	0.74							0.41
327	0.76							0.41
328	0.79
329	0.78
330	0.82
331	0.75
332	-0.14
333	0.66
334	0.8
335	0.78
336	0.73
337	0.81
338	0.82
339	0.78
340	0.87
341	0.8
342	0.67
343	0.63
344	0.85
345	0.88
346	0.79
347	0.74
348	0.31
349	0.04
350	0.13
351	0.52
352	0.66
353	0.72
354	0.58
355	0.69
356	0.57
357	0.64
358	0.26
359	0.62
360	0.77
361	0.66
362	0.68
363	-0.03
364	0.21
365	0.67
366	0.57
367	0.84
368	0.84
369	0.84
370	0.69
371	0.84
372	0.78
373	0.6
374	0.84
375	0.48

## Sheet: z-score_full_screen
Compound #	% Activity	z-score	# compounds with percent activity < 50%	# compounds with z-score < -3	Total Compounds	Total # with Z-score < -3 (excluding replicates)	Hit-rate (based on % Activity)	Hit-rate (based on z-score less than -3)
1	0.01	-11.1	963	262	118498	237	0.00812672	0.00200003
2	0.01	-9.3
3	0.01	-8.9
4	0.01	-8
5	0.01	-7.6
6	0.01	-7.5
7	0.01	-7
8	0.01	-6.8
9	0.011	-6.6
10	0.011	-6.4
11	0.011	-6.3
12	0.011	-6.3
13	0.012	-6
14	0.013	-5.9
15	0.013	-5.9
16	0.016	-5.9
17	0.017	-5.8
18	0.019	-5.8
19	0.026	-5.7
20	0.029	-5.7
21	0.034	-5.6
22	0.038	-5.6
23	0.039	-5.5
24	0.039	-5.5
25	0.039	-5.5
26	0.039	-5.4
27	0.04	-5.4
28	0.04	-5.4
29	0.041	-5.4
30	0.041	-5.4
31	0.041	-5.4
32	0.042	-5.4
33	0.042	-5.4
34	0.042	-5.4
35	0.042	-5.4
36	0.042	-5.4
37	0.042	-5.4
38	0.042	-5.3
39	0.042	-5.3
40	0.042	-5.3
41	0.043	-5.2
42	0.043	-5.2
43	0.043	-5.2
44	0.044	-5.2
45	0.044	-5.2
46	0.044	-5.2
47	0.044	-5.2
48	0.045	-5.1
49	0.045	-5.1
50	0.045	-5.1
51	0.045	-5.1
52	0.045	-5.1
53	0.045	-5.1
54	0.045	-5
55	0.045	-5
56	0.045	-5
57	0.045	-4.9
58	0.045	-4.9
59	0.045	-4.8
60	0.045	-4.8
61	0.045	-4.8
62	0.045	-4.8
63	0.046	-4.8
64	0.046	-4.8
65	0.046	-4.8
66	0.046	-4.8
67	0.046	-4.7
68	0.046	-4.7
69	0.046	-4.7
70	0.046	-4.7
71	0.046	-4.7
72	0.046	-4.6
73	0.046	-4.6
74	0.046	-4.6
75	0.046	-4.6
76	0.046	-4.5
77	0.046	-4.5
78	0.046	-4.5
79	0.046	-4.5
80	0.046	-4.5
81	0.046	-4.4
82	0.047	-4.4
83	0.047	-4.4
84	0.047	-4.4
85	0.047	-4.4
86	0.047	-4.4
87	0.047	-4.4
88	0.047	-4.4
89	0.047	-4.3
90	0.047	-4.3
91	0.047	-4.3
92	0.047	-4.3
93	0.047	-4.3
94	0.047	-4.2
95	0.048	-4.2
96	0.048	-4.2
97	0.048	-4.2
98	0.048	-4.2
99	0.048	-4.1
100	0.048	-4.1
101	0.048	-4.1
102	0.048	-4.1
103	0.048	-4.1
104	0.048	-4.1
105	0.048	-4.1
106	0.049	-4.1
107	0.049	-4
108	0.049	-4
109	0.049	-4
110	0.049	-4
111	0.049	-4
112	0.049	-4
113	0.049	-4
114	0.05	-4
115	0.05	-3.9
116	0.05	-3.9
117	0.05	-3.9
118	0.05	-3.9
119	0.05	-3.9
120	0.05	-3.9
121	0.05	-3.9
122	0.05	-3.9
123	0.05	-3.9
124	0.05	-3.9
125	0.05	-3.9
126	0.05	-3.9
127	0.05	-3.9
128	0.05	-3.8
129	0.05	-3.8
130	0.05	-3.8
131	0.05	-3.8
132	0.05	-3.8
133	0.05	-3.8
134	0.051	-3.8
135	0.051	-3.8
136	0.051	-3.8
137	0.051	-3.7
138	0.051	-3.7
139	0.052	-3.7
140	0.052	-3.7
141	0.052	-3.7
142	0.052	-3.7
143	0.052	-3.7
144	0.052	-3.7
145	0.052	-3.6
146	0.052	-3.6
147	0.052	-3.6
148	0.052	-3.6
149	0.052	-3.6
150	0.053	-3.6
151	0.053	-3.6
152	0.053	-3.5
153	0.053	-3.5
154	0.053	-3.5
155	0.053	-3.5
156	0.053	-3.5
157	0.053	-3.5
158	0.053	-3.5
159	0.053	-3.5
160	0.053	-3.5
161	0.053	-3.5
162	0.053	-3.4
163	0.053	-3.4
164	0.053	-3.4
165	0.053	-3.4
166	0.053	-3.4
167	0.054	-3.4
168	0.054	-3.4
169	0.054	-3.4
170	0.054	-3.4
171	0.054	-3.4
172	0.054	-3.4
173	0.054	-3.4
174	0.054	-3.4
175	0.055	-3.3
176	0.055	-3.3
177	0.055	-3.3
178	0.055	-3.3
179	0.055	-3.3
180	0.055	-3.3
181	0.055	-3.3
182	0.055	-3.3
183	0.055	-3.3
184	0.055	-3.3
185	0.055	-3.3
186	0.056	-3.3
187	0.056	-3.3
188	0.056	-3.3
189	0.056	-3.3
190	0.056	-3.3
191	0.056	-3.3
192	0.056	-3.3
193	0.056	-3.3
194	0.056	-3.2
195	0.056	-3.2
196	0.057	-3.2
197	0.057	-3.2
198	0.057	-3.2
199	0.057	-3.2
200	0.057	-3.2
201	0.057	-3.2
202	0.057	-3.2
203	0.057	-3.2
204	0.057	-3.2
205	0.057	-3.2
206	0.057	-3.2
207	0.057	-3.2
208	0.057	-3.2
209	0.057	-3.2
210	0.057	-3.2
211	0.057	-3.2
212	0.058	-3.2
213	0.058	-3.2
214	0.058	-3.2
215	0.058	-3.2
216	0.058	-3.1
217	0.058	-3.1
218	0.058	-3.1
219	0.058	-3.1
220	0.058	-3.1
221	0.058	-3.1
222	0.058	-3.1
223	0.059	-3.1
224	0.059	-3.1
225	0.059	-3.1
226	0.059	-3.1
227	0.059	-3.1
228	0.059	-3.1
229	0.059	-3.1
230	0.059	-3.1
231	0.059	-3.1
232	0.059	-3.1
233	0.059	-3.1
234	0.06	-3.1
235	0.06	-3.1
236	0.06	-3
237	0.06	-3
238	0.06	-3
239	0.06	-3
240	0.06	-3
241	0.06	-3
242	0.06	-3
243	0.061	-3
244	0.061	-3
245	0.061	-3
246	0.061	-3
247	0.061	-3
248	0.061	-3
249	0.061	-3
250	0.061	-3
251	0.061	-3
252	0.062	-3
253	0.062	-3
254	0.062	-3
255	0.062	-3
256	0.062	-3
257	0.062	-3
258	0.063	-3
259	0.063	-3
260	0.063	-3
261	0.063	-3
262	0.063	-3
263	0.063	-2.9
264	0.063	-2.9
265	0.063	-2.9
266	0.064	-2.9
267	0.064	-2.9
268	0.064	-2.9
269	0.064	-2.9
270	0.064	-2.9
271	0.064	-2.9
272	0.065	-2.9
273	0.065	-2.9
274	0.065	-2.9
275	0.065	-2.9
276	0.065	-2.9
277	0.066	-2.9
278	0.066	-2.9
279	0.066	-2.9
280	0.066	-2.9
281	0.066	-2.9
282	0.067	-2.8
283	0.067	-2.8
284	0.067	-2.8
285	0.067	-2.8
286	0.067	-2.8
287	0.067	-2.8
288	0.067	-2.8
289	0.068	-2.8
290	0.068	-2.8
291	0.068	-2.8
292	0.069	-2.8
293	0.069	-2.8
294	0.069	-2.8
295	0.069	-2.8
296	0.069	-2.8
297	0.069	-2.8
298	0.07	-2.8
299	0.07	-2.8
300	0.07	-2.8
301	0.07	-2.8
302	0.07	-2.8
303	0.071	-2.8
304	0.072	-2.8
305	0.072	-2.8
306	0.072	-2.8
307	0.073	-2.8
308	0.074	-2.8
309	0.074	-2.8
310	0.075	-2.7
311	0.075	-2.7
312	0.076	-2.7
313	0.078	-2.7
314	0.078	-2.7
315	0.078	-2.7
316	0.079	-2.7
317	0.079	-2.7
318	0.081	-2.7
319	0.084	-2.7
320	0.084	-2.7
321	0.085	-2.7
322	0.085	-2.7
323	0.085	-2.7
324	0.086	-2.7
325	0.087	-2.7
326	0.088	-2.7
327	0.088	-2.7
328	0.089	-2.7
329	0.09	-2.7
330	0.09	-2.7
331	0.093	-2.7
332	0.094	-2.7
333	0.094	-2.7
334	0.095	-2.7
335	0.096	-2.7
336	0.101	-2.7
337	0.105	-2.7
338	0.106	-2.7
339	0.107	-2.7
340	0.109	-2.7
341	0.11	-2.7
342	0.111	-2.7
343	0.111	-2.7
344	0.111	-2.7
345	0.112	-2.7
346	0.121	-2.7
347	0.121	-2.7
348	0.122	-2.7
349	0.122	-2.7
350	0.124	-2.7
351	0.124	-2.7
352	0.126	-2.7
353	0.129	-2.7
354	0.13	-2.7
355	0.132	-2.7
356	0.141	-2.6
357	0.144	-2.6
358	0.145	-2.6
359	0.147	-2.6
360	0.148	-2.6
361	0.157	-2.6
362	0.164	-2.6
363	0.164	-2.6
364	0.166	-2.6
365	0.166	-2.6
366	0.169	-2.6
367	0.171	-2.6
368	0.171	-2.6
369	0.175	-2.6
370	0.175	-2.6
371	0.175	-2.6
372	0.178	-2.6
373	0.179	-2.6
374	0.181	-2.6
375	0.182	-2.6
376	0.187	-2.6
377	0.187	-2.6
378	0.188	-2.6
379	0.19	-2.6
380	0.191	-2.6
381	0.193	-2.6
382	0.193	-2.6
383	0.194	-2.6
384	0.197	-2.6
385	0.198	-2.6
386	0.2	-2.6
387	0.201	-2.6
388	0.207	-2.6
389	0.208	-2.6
390	0.209	-2.6
391	0.209	-2.6
392	0.21	-2.6
393	0.216	-2.6
394	0.218	-2.6
395	0.218	-2.6
396	0.219	-2.6
397	0.22	-2.6
398	0.221	-2.6
399	0.225	-2.6
400	0.225	-2.6
401	0.227	-2.6
402	0.231	-2.5
403	0.232	-2.5
404	0.233	-2.5
405	0.234	-2.5
406	0.235	-2.5
407	0.237	-2.5
408	0.24	-2.5
409	0.24	-2.5
410	0.242	-2.5
411	0.242	-2.5
412	0.242	-2.5
413	0.247	-2.5
414	0.247	-2.5
415	0.249	-2.5
416	0.25	-2.5
417	0.253	-2.5
418	0.254	-2.5
419	0.257	-2.5
420	0.258	-2.5
421	0.258	-2.5
422	0.26	-2.5
423	0.262	-2.5
424	0.262	-2.5
425	0.263	-2.5
426	0.263	-2.5
427	0.263	-2.5
428	0.263	-2.5
429	0.263	-2.5
430	0.264	-2.5
431	0.264	-2.5
432	0.265	-2.5
433	0.265	-2.5
434	0.265	-2.5
435	0.268	-2.5
436	0.268	-2.5
437	0.268	-2.5
438	0.268	-2.5
439	0.268	-2.5
440	0.271	-2.5
441	0.272	-2.5
442	0.273	-2.5
443	0.276	-2.5
444	0.277	-2.5
445	0.278	-2.5
446	0.278	-2.5
447	0.279	-2.5
448	0.279	-2.5
449	0.28	-2.5
450	0.28	-2.5
451	0.281	-2.4
452	0.281	-2.4
453	0.282	-2.4
454	0.283	-2.4
455	0.284	-2.4
456	0.284	-2.4
457	0.285	-2.4
458	0.287	-2.4
459	0.287	-2.4
460	0.288	-2.4
461	0.288	-2.4
462	0.288	-2.4
463	0.29	-2.4
464	0.291	-2.4
465	0.292	-2.4
466	0.292	-2.4
467	0.295	-2.4
468	0.295	-2.4
469	0.295	-2.4
470	0.296	-2.4
471	0.297	-2.4
472	0.298	-2.4
473	0.298	-2.4
474	0.298	-2.4
475	0.298	-2.4
476	0.3	-2.4
477	0.3	-2.4
478	0.301	-2.4
479	0.302	-2.4
480	0.302	-2.4
481	0.302	-2.4
482	0.303	-2.4
483	0.303	-2.4
484	0.303	-2.4
485	0.304	-2.4
486	0.304	-2.4
487	0.304	-2.4
488	0.306	-2.4
489	0.306	-2.4
490	0.308	-2.4
491	0.308	-2.4
492	0.308	-2.4
493	0.308	-2.4
494	0.31	-2.4
495	0.312	-2.4
496	0.312	-2.4
497	0.314	-2.4
498	0.314	-2.4
499	0.318	-2.4
500	0.321	-2.4
501	0.321	-2.4
502	0.322	-2.4
503	0.323	-2.4
504	0.323	-2.4
505	0.323	-2.4
506	0.323	-2.4
507	0.325	-2.4
508	0.325	-2.4
509	0.327	-2.4
510	0.328	-2.4
511	0.328	-2.4
512	0.328	-2.4
513	0.328	-2.4
514	0.328	-2.4
515	0.329	-2.4
516	0.329	-2.4
517	0.329	-2.4
518	0.333	-2.4
519	0.333	-2.4
520	0.333	-2.4
521	0.333	-2.4
522	0.333	-2.4
523	0.334	-2.4
524	0.335	-2.4
525	0.337	-2.4
526	0.337	-2.4
527	0.337	-2.4
528	0.338	-2.4
529	0.341	-2.4
530	0.343	-2.4
531	0.343	-2.3
532	0.343	-2.3
533	0.343	-2.3
534	0.343	-2.3
535	0.343	-2.3
536	0.345	-2.3
537	0.345	-2.3
538	0.346	-2.3
539	0.346	-2.3
540	0.347	-2.3
541	0.347	-2.3
542	0.347	-2.3
543	0.348	-2.3
544	0.348	-2.3
545	0.348	-2.3
546	0.35	-2.3
547	0.35	-2.3
548	0.35	-2.3
549	0.352	-2.3
550	0.353	-2.3
551	0.354	-2.3
552	0.354	-2.3
553	0.354	-2.3
554	0.354	-2.3
555	0.355	-2.3
556	0.356	-2.3
557	0.357	-2.3
558	0.357	-2.3
559	0.358	-2.3
560	0.358	-2.3
561	0.359	-2.3
562	0.359	-2.3
563	0.359	-2.3
564	0.36	-2.3
565	0.361	-2.3
566	0.361	-2.3
567	0.362	-2.3
568	0.362	-2.3
569	0.363	-2.3
570	0.364	-2.3
571	0.364	-2.3
572	0.366	-2.3
573	0.366	-2.3
574	0.367	-2.3
575	0.367	-2.3
576	0.368	-2.3
577	0.368	-2.3
578	0.369	-2.3
579	0.371	-2.3
580	0.371	-2.3
581	0.372	-2.3
582	0.373	-2.3
583	0.374	-2.3
584	0.377	-2.3
585	0.377	-2.3
586	0.379	-2.3
587	0.379	-2.3
588	0.379	-2.3
589	0.379	-2.3
590	0.381	-2.3
591	0.382	-2.3
592	0.383	-2.3
593	0.383	-2.3
594	0.383	-2.3
595	0.383	-2.3
596	0.385	-2.3
597	0.386	-2.3
598	0.387	-2.3
599	0.387	-2.3
600	0.388	-2.3
601	0.389	-2.3
602	0.39	-2.3
603	0.391	-2.2
604	0.391	-2.2
605	0.391	-2.2
606	0.391	-2.2
607	0.391	-2.2
608	0.391	-2.2
609	0.392	-2.2
610	0.392	-2.2
611	0.392	-2.2
612	0.394	-2.2
613	0.394	-2.2
614	0.394	-2.2
615	0.394	-2.2
616	0.394	-2.2
617	0.394	-2.2
618	0.395	-2.2
619	0.395	-2.2
620	0.398	-2.2
621	0.398	-2.2
622	0.399	-2.2
623	0.399	-2.2
624	0.399	-2.2
625	0.399	-2.2
626	0.399	-2.2
627	0.399	-2.2
628	0.399	-2.2
629	0.4	-2.2
630	0.4	-2.2
631	0.402	-2.2
632	0.402	-2.2
633	0.402	-2.2
634	0.403	-2.2
635	0.404	-2.2
636	0.404	-2.2
637	0.404	-2.2
638	0.404	-2.2
639	0.405	-2.2
640	0.405	-2.2
641	0.405	-2.2
642	0.405	-2.2
643	0.406	-2.2
644	0.407	-2.2
645	0.407	-2.2
646	0.407	-2.2
647	0.409	-2.2
648	0.409	-2.2
649	0.409	-2.2
650	0.41	-2.2
651	0.411	-2.2
652	0.411	-2.2
653	0.412	-2.2
654	0.412	-2.2
655	0.412	-2.2
656	0.413	-2.2
657	0.413	-2.2
658	0.414	-2.2
659	0.415	-2.2
660	0.416	-2.2
661	0.417	-2.2
662	0.418	-2.2
663	0.419	-2.2
664	0.419	-2.2
665	0.42	-2.2
666	0.421	-2.2
667	0.421	-2.2
668	0.421	-2.2
669	0.423	-2.2
670	0.423	-2.2
671	0.425	-2.2
672	0.425	-2.2
673	0.425	-2.2
674	0.426	-2.2
675	0.426	-2.2
676	0.426	-2.2
677	0.426	-2.2
678	0.427	-2.2
679	0.428	-2.2
680	0.43	-2.2
681	0.43	-2.2
682	0.431	-2.2
683	0.431	-2.2
684	0.432	-2.2
685	0.432	-2.2
686	0.432	-2.2
687	0.432	-2.2
688	0.432	-2.2
689	0.433	-2.2
690	0.433	-2.2
691	0.433	-2.2
692	0.434	-2.2
693	0.434	-2.2
694	0.434	-2.2
695	0.435	-2.2
696	0.436	-2.2
697	0.436	-2.2
698	0.437	-2.2
699	0.437	-2.2
700	0.437	-2.2
701	0.437	-2.2
702	0.437	-2.2
703	0.438	-2.2
704	0.438	-2.1
705	0.439	-2.1
706	0.44	-2.1
707	0.441	-2.1
708	0.441	-2.1
709	0.441	-2.1
710	0.442	-2.1
711	0.442	-2.1
712	0.442	-2.1
713	0.442	-2.1
714	0.442	-2.1
715	0.442	-2.1
716	0.442	-2.1
717	0.442	-2.1
718	0.442	-2.1
719	0.443	-2.1
720	0.443	-2.1
721	0.443	-2.1
722	0.443	-2.1
723	0.443	-2.1
724	0.444	-2.1
725	0.444	-2.1
726	0.444	-2.1
727	0.444	-2.1
728	0.444	-2.1
729	0.444	-2.1
730	0.445	-2.1
731	0.445	-2.1
732	0.446	-2.1
733	0.446	-2.1
734	0.447	-2.1
735	0.447	-2.1
736	0.447	-2.1
737	0.448	-2.1
738	0.448	-2.1
739	0.448	-2.1
740	0.448	-2.1
741	0.448	-2.1
742	0.448	-2.1
743	0.448	-2.1
744	0.449	-2.1
745	0.449	-2.1
746	0.449	-2.1
747	0.449	-2.1
748	0.449	-2.1
749	0.449	-2.1
750	0.449	-2.1
751	0.449	-2.1
752	0.45	-2.1
753	0.45	-2.1
754	0.45	-2.1
755	0.452	-2.1
756	0.452	-2.1
757	0.452	-2.1
758	0.453	-2.1
759	0.453	-2.1
760	0.453	-2.1
761	0.453	-2.1
762	0.453	-2.1
763	0.453	-2.1
764	0.454	-2.1
765	0.454	-2.1
766	0.454	-2.1
767	0.454	-2.1
768	0.454	-2.1
769	0.455	-2.1
770	0.455	-2.1
771	0.456	-2.1
772	0.456	-2.1
773	0.456	-2.1
774	0.456	-2.1
775	0.457	-2.1
776	0.458	-2.1
777	0.458	-2.1
778	0.458	-2.1
779	0.458	-2.1
780	0.458	-2.1
781	0.459	-2.1
782	0.459	-2.1
783	0.459	-2.1
784	0.459	-2.1
785	0.459	-2.1
786	0.459	-2.1
787	0.46	-2.1
788	0.46	-2.1
789	0.46	-2.1
790	0.461	-2.1
791	0.461	-2.1
792	0.461	-2.1
793	0.461	-2.1
794	0.461	-2.1
795	0.461	-2.1
796	0.463	-2.1
797	0.464	-2.1
798	0.464	-2.1
799	0.464	-2.1
800	0.464	-2.1
801	0.464	-2.1
802	0.465	-2.1
803	0.465	-2.1
804	0.465	-2.1
805	0.465	-2.1
806	0.466	-2.1
807	0.466	-2.1
808	0.467	-2.1
809	0.467	-2.1
810	0.467	-2.1
811	0.468	-2.1
812	0.468	-2.1
813	0.469	-2.1
814	0.469	-2.1
815	0.469	-2.1
816	0.469	-2.1
817	0.469	-2.1
818	0.469	-2.1
819	0.47	-2.1
820	0.47	-2.1
821	0.47	-2.1
822	0.47	-2.1
823	0.47	-2.1
824	0.47	-2.1
825	0.47	-2.1
826	0.47	-2.1
827	0.471	-2.1
828	0.471	-2.1
829	0.471	-2.1
830	0.471	-2.1
831	0.471	-2.1
832	0.472	-2.1
833	0.473	-2.1
834	0.473	-2.1
835	0.473	-2.1
836	0.474	-2.1
837	0.474	-2.1
838	0.474	-2.1
839	0.474	-2.1
840	0.474	-2.1
841	0.475	-2.1
842	0.475	-2.1
843	0.475	-2
844	0.475	-2
845	0.475	-2
846	0.475	-2
847	0.476	-2
848	0.476	-2
849	0.477	-2
850	0.477	-2
851	0.477	-2
852	0.478	-2
853	0.478	-2
854	0.478	-2
855	0.478	-2
856	0.479	-2
857	0.479	-2
858	0.479	-2
859	0.479	-2
860	0.48	-2
861	0.48	-2
862	0.48	-2
863	0.48	-2
864	0.48	-2
865	0.48	-2
866	0.48	-2
867	0.48	-2
868	0.48	-2
869	0.481	-2
870	0.482	-2
871	0.483	-2
872	0.483	-2
873	0.483	-2
874	0.483	-2
875	0.483	-2
876	0.483	-2
877	0.484	-2
878	0.484	-2
879	0.484	-2
880	0.485	-2
881	0.485	-2
882	0.485	-2
883	0.485	-2
884	0.485	-2
885	0.485	-2
886	0.486	-2
887	0.486	-2
888	0.486	-2
889	0.486	-2
890	0.486	-2
891	0.486	-2
892	0.486	-2
893	0.486	-2
894	0.486	-2
895	0.486	-2
896	0.486	-2
897	0.486	-2
898	0.487	-2
899	0.487	-2
900	0.487	-2
901	0.488	-2
902	0.488	-2
903	0.488	-2
904	0.488	-2
905	0.488	-2
906	0.488	-2
907	0.489	-2
908	0.489	-2
909	0.489	-2
910	0.489	-2
911	0.489	-2
912	0.49	-2
913	0.49	-2
914	0.49	-2
915	0.49	-2
916	0.49	-2
917	0.49	-2
918	0.49	-2
919	0.491	-2
920	0.491	-2
921	0.492	-2
922	0.492	-2
923	0.492	-2
924	0.493	-2
925	0.493	-2
926	0.493	-2
927	0.493	-2
928	0.493	-2
929	0.493	-2
930	0.493	-2
931	0.493	-2
932	0.494	-2
933	0.494	-2
934	0.495	-2
935	0.495	-2
936	0.495	-2
937	0.495	-2
938	0.495	-2
939	0.496	-2
940	0.496	-2
941	0.496	-2
942	0.496	-2
943	0.496	-2
944	0.496	-2
945	0.497	-2
946	0.497	-2
947	0.497	-2
948	0.497	-2
949	0.498	-2
950	0.498	-2
951	0.499	-2
952	0.499	-2
953	0.499	-2
954	0.499	-2
955	0.499	-2
956	0.5	-2
957	0.5	-2
958	0.5	-2
959	0.5	-2
960	0.5	-2
961	0.5	-2
962	0.5	-2
963	0.5	-2
964	0.501	-2
965	0.501	-2
966	0.501	-2
967	0.501	-2
968	0.501	-2
969	0.501	-2
970	0.502	-2
971	0.502	-2
972	0.502	-2
973	0.502	-2
974	0.502	-2
975	0.502	-2
976	0.502	-2
977	0.502	-2
978	0.503	-2
979	0.503	-2
980	0.503	-2
981	0.503	-2
982	0.503	-2
983	0.504	-2
984	0.504	-2
985	0.505	-2
986	0.505	-2
987	0.505	-2
988	0.505	-2
989	0.505	-2
990	0.506	-2
991	0.506	-2
992	0.506	-2
993	0.506	-2
994	0.506	-2
995	0.507	-2
996	0.507	-2
997	0.507	-2
998	0.507	-2
999	0.507	-2
1000	0.507	-2
1001	0.508	-2
1002	0.508	-2
1003	0.508	-2
1004	0.509	-1.9
1005	0.509	-1.9
1006	0.509	-1.9
1007	0.51	-1.9
1008	0.51	-1.9
1009	0.51	-1.9
1010	0.51	-1.9
1011	0.51	-1.9
1012	0.51	-1.9
1013	0.51	-1.9
1014	0.51	-1.9
1015	0.51	-1.9
1016	0.51	-1.9
1017	0.51	-1.9
1018	0.51	-1.9
1019	0.511	-1.9
1020	0.511	-1.9
1021	0.511	-1.9
1022	0.511	-1.9
1023	0.511	-1.9
1024	0.511	-1.9
1025	0.512	-1.9
1026	0.512	-1.9
1027	0.512	-1.9
1028	0.512	-1.9
1029	0.512	-1.9
1030	0.512	-1.9
1031	0.512	-1.9
1032	0.513	-1.9
1033	0.513	-1.9
1034	0.513	-1.9
1035	0.513	-1.9
1036	0.513	-1.9
1037	0.513	-1.9
1038	0.514	-1.9
1039	0.514	-1.9
1040	0.514	-1.9
1041	0.514	-1.9
1042	0.514	-1.9
1043	0.514	-1.9
1044	0.515	-1.9
1045	0.515	-1.9
1046	0.515	-1.9
1047	0.515	-1.9
1048	0.515	-1.9
1049	0.516	-1.9
1050	0.516	-1.9
1051	0.516	-1.9
1052	0.517	-1.9
1053	0.517	-1.9
1054	0.517	-1.9
1055	0.517	-1.9
1056	0.518	-1.9
1057	0.518	-1.9
1058	0.518	-1.9
1059	0.518	-1.9
1060	0.518	-1.9
1061	0.518	-1.9
1062	0.518	-1.9
1063	0.518	-1.9
1064	0.518	-1.9
1065	0.519	-1.9
1066	0.519	-1.9
1067	0.519	-1.9
1068	0.519	-1.9
1069	0.519	-1.9
1070	0.519	-1.9
1071	0.52	-1.9
1072	0.52	-1.9
1073	0.52	-1.9
1074	0.52	-1.9
1075	0.52	-1.9
1076	0.52	-1.9
1077	0.521	-1.9
1078	0.521	-1.9
1079	0.521	-1.9
1080	0.521	-1.9
1081	0.521	-1.9
1082	0.521	-1.9
1083	0.521	-1.9
1084	0.521	-1.9
1085	0.521	-1.9
1086	0.521	-1.9
1087	0.522	-1.9
1088	0.522	-1.9
1089	0.522	-1.9
1090	0.522	-1.9
1091	0.522	-1.9
1092	0.522	-1.9
1093	0.522	-1.9
1094	0.523	-1.9
1095	0.523	-1.9
1096	0.524	-1.9
1097	0.524	-1.9
1098	0.524	-1.9
1099	0.524	-1.9
1100	0.524	-1.9
1101	0.524	-1.9
1102	0.524	-1.9
1103	0.524	-1.9
1104	0.524	-1.9
1105	0.525	-1.9
1106	0.525	-1.9
1107	0.525	-1.9
1108	0.525	-1.9
1109	0.525	-1.9
1110	0.525	-1.9
1111	0.525	-1.9
1112	0.525	-1.9
1113	0.525	-1.9
1114	0.525	-1.9
1115	0.526	-1.9
1116	0.526	-1.9
1117	0.526	-1.9
1118	0.526	-1.9
1119	0.527	-1.9
1120	0.527	-1.9
1121	0.527	-1.9
1122	0.527	-1.9
1123	0.527	-1.9
1124	0.528	-1.9
1125	0.528	-1.9
1126	0.528	-1.9
1127	0.528	-1.9
1128	0.528	-1.9
1129	0.528	-1.9
1130	0.528	-1.9
1131	0.529	-1.9
1132	0.529	-1.9
1133	0.529	-1.9
1134	0.529	-1.9
1135	0.529	-1.9
1136	0.529	-1.9
1137	0.529	-1.9
1138	0.53	-1.9
1139	0.53	-1.9
1140	0.53	-1.9
1141	0.53	-1.9
1142	0.53	-1.9
1143	0.53	-1.9
1144	0.53	-1.9
1145	0.53	-1.9
1146	0.53	-1.9
1147	0.53	-1.9
1148	0.531	-1.9
1149	0.531	-1.9
1150	0.531	-1.9
1151	0.531	-1.9
1152	0.531	-1.9
1153	0.531	-1.9
1154	0.531	-1.9
1155	0.531	-1.9
1156	0.532	-1.9
1157	0.532	-1.9
1158	0.532	-1.9
1159	0.532	-1.9
1160	0.532	-1.9
1161	0.532	-1.9
1162	0.532	-1.9
1163	0.533	-1.9
1164	0.533	-1.9
1165	0.533	-1.9
1166	0.533	-1.9
1167	0.533	-1.9
1168	0.533	-1.9
1169	0.533	-1.9
1170	0.533	-1.9
1171	0.533	-1.9
1172	0.533	-1.9
1173	0.534	-1.9
1174	0.534	-1.9
1175	0.534	-1.9
1176	0.534	-1.9
1177	0.535	-1.9
1178	0.535	-1.9
1179	0.535	-1.9
1180	0.535	-1.9
1181	0.535	-1.9
1182	0.535	-1.9
1183	0.535	-1.9
1184	0.535	-1.9
1185	0.535	-1.9
1186	0.536	-1.9
1187	0.536	-1.9
1188	0.536	-1.9
1189	0.536	-1.9
1190	0.536	-1.9
1191	0.536	-1.9
1192	0.536	-1.9
1193	0.536	-1.9
1194	0.536	-1.9
1195	0.537	-1.9
1196	0.537	-1.9
1197	0.537	-1.9
1198	0.537	-1.9
1199	0.537	-1.9
1200	0.538	-1.9
1201	0.538	-1.9
1202	0.538	-1.9
1203	0.538	-1.9
1204	0.538	-1.9
1205	0.538	-1.9
1206	0.538	-1.9
1207	0.538	-1.9
1208	0.539	-1.9
1209	0.539	-1.9
1210	0.539	-1.9
1211	0.539	-1.9
1212	0.539	-1.9
1213	0.539	-1.9
1214	0.539	-1.9
1215	0.539	-1.9
1216	0.539	-1.9
1217	0.539	-1.9
1218	0.539	-1.9
1219	0.539	-1.9
1220	0.539	-1.9
1221	0.54	-1.9
1222	0.54	-1.9
1223	0.54	-1.9
1224	0.54	-1.9
1225	0.54	-1.9
1226	0.54	-1.9
1227	0.54	-1.9
1228	0.541	-1.9
1229	0.541	-1.9
1230	0.541	-1.9
1231	0.541	-1.9
1232	0.541	-1.9
1233	0.541	-1.9
1234	0.541	-1.9
1235	0.541	-1.9
1236	0.541	-1.9
1237	0.541	-1.9
1238	0.542	-1.9
1239	0.542	-1.9
1240	0.542	-1.9
1241	0.542	-1.9
1242	0.543	-1.9
1243	0.543	-1.9
1244	0.543	-1.9
1245	0.544	-1.9
1246	0.544	-1.9
1247	0.544	-1.9
1248	0.544	-1.9
1249	0.544	-1.9
1250	0.544	-1.9
1251	0.544	-1.9
1252	0.544	-1.9
1253	0.544	-1.9
1254	0.544	-1.9
1255	0.545	-1.9
1256	0.545	-1.9
1257	0.545	-1.9
1258	0.545	-1.9
1259	0.545	-1.9
1260	0.545	-1.9
1261	0.545	-1.9
1262	0.545	-1.9
1263	0.545	-1.9
1264	0.545	-1.9
1265	0.545	-1.9
1266	0.545	-1.9
1267	0.545	-1.9
1268	0.546	-1.9
1269	0.546	-1.8
1270	0.546	-1.8
1271	0.546	-1.8
1272	0.546	-1.8
1273	0.546	-1.8
1274	0.547	-1.8
1275	0.547	-1.8
1276	0.547	-1.8
1277	0.547	-1.8
1278	0.547	-1.8
1279	0.547	-1.8
1280	0.547	-1.8
1281	0.547	-1.8
1282	0.548	-1.8
1283	0.548	-1.8
1284	0.548	-1.8
1285	0.548	-1.8
1286	0.548	-1.8
1287	0.548	-1.8
1288	0.548	-1.8
1289	0.548	-1.8
1290	0.548	-1.8
1291	0.549	-1.8
1292	0.549	-1.8
1293	0.549	-1.8
1294	0.549	-1.8
1295	0.549	-1.8
1296	0.549	-1.8
1297	0.549	-1.8
1298	0.549	-1.8
1299	0.55	-1.8
1300	0.55	-1.8
1301	0.55	-1.8
1302	0.55	-1.8
1303	0.55	-1.8
1304	0.55	-1.8
1305	0.55	-1.8
1306	0.55	-1.8
1307	0.551	-1.8
1308	0.551	-1.8
1309	0.551	-1.8
1310	0.551	-1.8
1311	0.551	-1.8
1312	0.551	-1.8
1313	0.551	-1.8
1314	0.552	-1.8
1315	0.552	-1.8
1316	0.552	-1.8
1317	0.552	-1.8
1318	0.552	-1.8
1319	0.552	-1.8
1320	0.552	-1.8
1321	0.552	-1.8
1322	0.552	-1.8
1323	0.553	-1.8
1324	0.553	-1.8
1325	0.553	-1.8
1326	0.553	-1.8
1327	0.553	-1.8
1328	0.553	-1.8
1329	0.553	-1.8
1330	0.553	-1.8
1331	0.553	-1.8
1332	0.553	-1.8
1333	0.553	-1.8
1334	0.553	-1.8
1335	0.554	-1.8
1336	0.554	-1.8
1337	0.555	-1.8
1338	0.555	-1.8
1339	0.555	-1.8
1340	0.555	-1.8
1341	0.555	-1.8
1342	0.555	-1.8
1343	0.555	-1.8
1344	0.555	-1.8
1345	0.555	-1.8
1346	0.555	-1.8
1347	0.555	-1.8
1348	0.555	-1.8
1349	0.555	-1.8
1350	0.556	-1.8
1351	0.556	-1.8
1352	0.556	-1.8
1353	0.556	-1.8
1354	0.556	-1.8
1355	0.556	-1.8
1356	0.556	-1.8
1357	0.556	-1.8
1358	0.556	-1.8
1359	0.556	-1.8
1360	0.556	-1.8
1361	0.556	-1.8
1362	0.556	-1.8
1363	0.556	-1.8
1364	0.556	-1.8
1365	0.557	-1.8
1366	0.557	-1.8
1367	0.557	-1.8
1368	0.557	-1.8
1369	0.557	-1.8
1370	0.557	-1.8
1371	0.557	-1.8
1372	0.557	-1.8
1373	0.557	-1.8
1374	0.558	-1.8
1375	0.558	-1.8
1376	0.558	-1.8
1377	0.558	-1.8
1378	0.558	-1.8
1379	0.558	-1.8
1380	0.558	-1.8
1381	0.558	-1.8
1382	0.558	-1.8
1383	0.559	-1.8
1384	0.559	-1.8
1385	0.559	-1.8
1386	0.559	-1.8
1387	0.559	-1.8
1388	0.559	-1.8
1389	0.559	-1.8
1390	0.559	-1.8
1391	0.559	-1.8
1392	0.559	-1.8
1393	0.56	-1.8
1394	0.56	-1.8
1395	0.56	-1.8
1396	0.56	-1.8
1397	0.56	-1.8
1398	0.56	-1.8
1399	0.56	-1.8
1400	0.56	-1.8
1401	0.56	-1.8
1402	0.56	-1.8
1403	0.561	-1.8
1404	0.561	-1.8
1405	0.561	-1.8
1406	0.561	-1.8
1407	0.561	-1.8
1408	0.561	-1.8
1409	0.561	-1.8
1410	0.561	-1.8
1411	0.561	-1.8
1412	0.561	-1.8
1413	0.561	-1.8
1414	0.561	-1.8
1415	0.561	-1.8
1416	0.562	-1.8
1417	0.562	-1.8
1418	0.562	-1.8
1419	0.562	-1.8
1420	0.562	-1.8
1421	0.562	-1.8
1422	0.562	-1.8
1423	0.562	-1.8
1424	0.562	-1.8
1425	0.562	-1.8
1426	0.562	-1.8
1427	0.562	-1.8
1428	0.563	-1.8
1429	0.563	-1.8
1430	0.563	-1.8
1431	0.563	-1.8
1432	0.563	-1.8
1433	0.563	-1.8
1434	0.563	-1.8
1435	0.563	-1.8
1436	0.563	-1.8
1437	0.563	-1.8
1438	0.563	-1.8
1439	0.563	-1.8
1440	0.563	-1.8
1441	0.563	-1.8
1442	0.564	-1.8
1443	0.564	-1.8
1444	0.564	-1.8
1445	0.564	-1.8
1446	0.564	-1.8
1447	0.564	-1.8
1448	0.564	-1.8
1449	0.564	-1.8
1450	0.564	-1.8
1451	0.564	-1.8
1452	0.564	-1.8
1453	0.564	-1.8
1454	0.564	-1.8
1455	0.564	-1.8
1456	0.565	-1.8
1457	0.565	-1.8
1458	0.565	-1.8
1459	0.565	-1.8
1460	0.565	-1.8
1461	0.565	-1.8
1462	0.565	-1.8
1463	0.565	-1.8
1464	0.565	-1.8
1465	0.565	-1.8
1466	0.565	-1.8
1467	0.565	-1.8
1468	0.565	-1.8
1469	0.566	-1.8
1470	0.566	-1.8
1471	0.566	-1.8
1472	0.566	-1.8
1473	0.566	-1.8
1474	0.566	-1.8
1475	0.566	-1.8
1476	0.566	-1.8
1477	0.566	-1.8
1478	0.566	-1.8
1479	0.566	-1.8
1480	0.566	-1.8
1481	0.566	-1.8
1482	0.566	-1.8
1483	0.566	-1.8
1484	0.567	-1.8
1485	0.567	-1.8
1486	0.567	-1.8
1487	0.567	-1.8
1488	0.567	-1.8
1489	0.567	-1.8
1490	0.567	-1.8
1491	0.567	-1.8
1492	0.567	-1.8
1493	0.568	-1.8
1494	0.568	-1.8
1495	0.568	-1.8
1496	0.568	-1.8
1497	0.568	-1.8
1498	0.568	-1.8
1499	0.568	-1.8
1500	0.568	-1.8
1501	0.569	-1.8
1502	0.569	-1.8
1503	0.569	-1.8
1504	0.569	-1.8
1505	0.569	-1.8
1506	0.57	-1.8
1507	0.57	-1.8
1508	0.57	-1.8
1509	0.57	-1.8
1510	0.571	-1.8
1511	0.571	-1.8
1512	0.571	-1.8
1513	0.571	-1.8
1514	0.571	-1.8
1515	0.571	-1.8
1516	0.571	-1.8
1517	0.571	-1.8
1518	0.571	-1.8
1519	0.571	-1.8
1520	0.571	-1.8
1521	0.571	-1.8
1522	0.572	-1.8
1523	0.572	-1.8
1524	0.572	-1.8
1525	0.572	-1.8
1526	0.572	-1.8
1527	0.572	-1.8
1528	0.572	-1.8
1529	0.572	-1.8
1530	0.572	-1.8
1531	0.572	-1.8
1532	0.572	-1.8
1533	0.573	-1.8
1534	0.573	-1.8
1535	0.573	-1.8
1536	0.573	-1.8
1537	0.573	-1.8
1538	0.573	-1.8
1539	0.573	-1.8
1540	0.573	-1.8
1541	0.573	-1.8
1542	0.573	-1.8
1543	0.573	-1.8
1544	0.573	-1.8
1545	0.573	-1.8
1546	0.573	-1.8
1547	0.574	-1.8
1548	0.574	-1.8
1549	0.574	-1.8
1550	0.574	-1.8
1551	0.574	-1.8
1552	0.574	-1.8
1553	0.574	-1.8
1554	0.574	-1.8
1555	0.574	-1.8
1556	0.574	-1.8
1557	0.574	-1.8
1558	0.574	-1.8
1559	0.574	-1.8
1560	0.574	-1.8
1561	0.574	-1.8
1562	0.575	-1.8
1563	0.575	-1.8
1564	0.575	-1.8
1565	0.575	-1.8
1566	0.575	-1.8
1567	0.575	-1.8
1568	0.576	-1.8
1569	0.576	-1.8
1570	0.576	-1.8
1571	0.576	-1.8
1572	0.576	-1.8
1573	0.576	-1.8
1574	0.576	-1.8
1575	0.576	-1.8
1576	0.576	-1.8
1577	0.576	-1.8
1578	0.576	-1.8
1579	0.576	-1.8
1580	0.576	-1.8
1581	0.577	-1.8
1582	0.577	-1.8
1583	0.577	-1.8
1584	0.577	-1.8
1585	0.577	-1.8
1586	0.577	-1.8
1587	0.577	-1.8
1588	0.577	-1.8
1589	0.577	-1.8
1590	0.577	-1.8
1591	0.577	-1.8
1592	0.577	-1.8
1593	0.577	-1.8
1594	0.577	-1.8
1595	0.577	-1.8
1596	0.577	-1.7
1597	0.577	-1.7
1598	0.578	-1.7
1599	0.578	-1.7
1600	0.578	-1.7
1601	0.578	-1.7
1602	0.578	-1.7
1603	0.578	-1.7
1604	0.578	-1.7
1605	0.578	-1.7
1606	0.578	-1.7
1607	0.579	-1.7
1608	0.579	-1.7
1609	0.579	-1.7
1610	0.579	-1.7
1611	0.579	-1.7
1612	0.579	-1.7
1613	0.579	-1.7
1614	0.579	-1.7
1615	0.579	-1.7
1616	0.579	-1.7
1617	0.579	-1.7
1618	0.579	-1.7
1619	0.58	-1.7
1620	0.58	-1.7
1621	0.58	-1.7
1622	0.58	-1.7
1623	0.58	-1.7
1624	0.58	-1.7
1625	0.58	-1.7
1626	0.58	-1.7
1627	0.58	-1.7
1628	0.58	-1.7
1629	0.58	-1.7
1630	0.58	-1.7
1631	0.581	-1.7
1632	0.581	-1.7
1633	0.581	-1.7
1634	0.581	-1.7
1635	0.581	-1.7
1636	0.581	-1.7
1637	0.581	-1.7
1638	0.581	-1.7
1639	0.581	-1.7
1640	0.581	-1.7
1641	0.581	-1.7
1642	0.581	-1.7
1643	0.581	-1.7
1644	0.581	-1.7
1645	0.581	-1.7
1646	0.581	-1.7
1647	0.582	-1.7
1648	0.582	-1.7
1649	0.582	-1.7
1650	0.582	-1.7
1651	0.582	-1.7
1652	0.582	-1.7
1653	0.582	-1.7
1654	0.582	-1.7
1655	0.582	-1.7
1656	0.583	-1.7
1657	0.583	-1.7
1658	0.583	-1.7
1659	0.583	-1.7
1660	0.583	-1.7
1661	0.583	-1.7
1662	0.583	-1.7
1663	0.583	-1.7
1664	0.583	-1.7
1665	0.583	-1.7
1666	0.583	-1.7
1667	0.584	-1.7
1668	0.584	-1.7
1669	0.584	-1.7
1670	0.584	-1.7
1671	0.584	-1.7
1672	0.584	-1.7
1673	0.584	-1.7
1674	0.584	-1.7
1675	0.584	-1.7
1676	0.584	-1.7
1677	0.584	-1.7
1678	0.584	-1.7
1679	0.584	-1.7
1680	0.585	-1.7
1681	0.585	-1.7
1682	0.585	-1.7
1683	0.585	-1.7
1684	0.585	-1.7
1685	0.585	-1.7
1686	0.585	-1.7
1687	0.586	-1.7
1688	0.586	-1.7
1689	0.586	-1.7
1690	0.586	-1.7
1691	0.586	-1.7
1692	0.586	-1.7
1693	0.586	-1.7
1694	0.586	-1.7
1695	0.586	-1.7
1696	0.586	-1.7
1697	0.586	-1.7
1698	0.586	-1.7
1699	0.586	-1.7
1700	0.586	-1.7
1701	0.586	-1.7
1702	0.586	-1.7
1703	0.586	-1.7
1704	0.586	-1.7
1705	0.587	-1.7
1706	0.587	-1.7
1707	0.587	-1.7
1708	0.587	-1.7
1709	0.587	-1.7
1710	0.587	-1.7
1711	0.587	-1.7
1712	0.587	-1.7
1713	0.587	-1.7
1714	0.587	-1.7
1715	0.587	-1.7
1716	0.587	-1.7
1717	0.587	-1.7
1718	0.587	-1.7
1719	0.587	-1.7
1720	0.587	-1.7
1721	0.587	-1.7
1722	0.587	-1.7
1723	0.588	-1.7
1724	0.588	-1.7
1725	0.588	-1.7
1726	0.588	-1.7
1727	0.588	-1.7
1728	0.589	-1.7
1729	0.589	-1.7
1730	0.589	-1.7
1731	0.589	-1.7
1732	0.589	-1.7
1733	0.589	-1.7
1734	0.589	-1.7
1735	0.589	-1.7
1736	0.589	-1.7
1737	0.589	-1.7
1738	0.589	-1.7
1739	0.589	-1.7
1740	0.589	-1.7
1741	0.589	-1.7
1742	0.589	-1.7
1743	0.589	-1.7
1744	0.589	-1.7
1745	0.589	-1.7
1746	0.589	-1.7
1747	0.589	-1.7
1748	0.59	-1.7
1749	0.59	-1.7
1750	0.59	-1.7
1751	0.59	-1.7
1752	0.59	-1.7
1753	0.59	-1.7
1754	0.59	-1.7
1755	0.59	-1.7
1756	0.59	-1.7
1757	0.59	-1.7
1758	0.59	-1.7
1759	0.59	-1.7
1760	0.59	-1.7
1761	0.59	-1.7
1762	0.59	-1.7
1763	0.591	-1.7
1764	0.591	-1.7
1765	0.591	-1.7
1766	0.591	-1.7
1767	0.591	-1.7
1768	0.591	-1.7
1769	0.591	-1.7
1770	0.591	-1.7
1771	0.591	-1.7
1772	0.591	-1.7
1773	0.591	-1.7
1774	0.591	-1.7
1775	0.591	-1.7
1776	0.591	-1.7
1777	0.592	-1.7
1778	0.592	-1.7
1779	0.592	-1.7
1780	0.592	-1.7
1781	0.592	-1.7
1782	0.592	-1.7
1783	0.592	-1.7
1784	0.592	-1.7
1785	0.592	-1.7
1786	0.592	-1.7
1787	0.592	-1.7
1788	0.593	-1.7
1789	0.593	-1.7
1790	0.593	-1.7
1791	0.593	-1.7
1792	0.593	-1.7
1793	0.593	-1.7
1794	0.593	-1.7
1795	0.593	-1.7
1796	0.593	-1.7
1797	0.593	-1.7
1798	0.594	-1.7
1799	0.594	-1.7
1800	0.594	-1.7
1801	0.594	-1.7
1802	0.594	-1.7
1803	0.594	-1.7
1804	0.594	-1.7
1805	0.594	-1.7
1806	0.594	-1.7
1807	0.595	-1.7
1808	0.595	-1.7
1809	0.595	-1.7
1810	0.595	-1.7
1811	0.595	-1.7
1812	0.595	-1.7
1813	0.595	-1.7
1814	0.595	-1.7
1815	0.595	-1.7
1816	0.595	-1.7
1817	0.595	-1.7
1818	0.595	-1.7
1819	0.595	-1.7
1820	0.595	-1.7
1821	0.595	-1.7
1822	0.595	-1.7
1823	0.595	-1.7
1824	0.595	-1.7
1825	0.595	-1.7
1826	0.595	-1.7
1827	0.595	-1.7
1828	0.596	-1.7
1829	0.596	-1.7
1830	0.596	-1.7
1831	0.596	-1.7
1832	0.596	-1.7
1833	0.596	-1.7
1834	0.596	-1.7
1835	0.596	-1.7
1836	0.596	-1.7
1837	0.596	-1.7
1838	0.596	-1.7
1839	0.596	-1.7
1840	0.596	-1.7
1841	0.596	-1.7
1842	0.596	-1.7
1843	0.597	-1.7
1844	0.597	-1.7
1845	0.597	-1.7
1846	0.597	-1.7
1847	0.597	-1.7
1848	0.597	-1.7
1849	0.597	-1.7
1850	0.597	-1.7
1851	0.597	-1.7
1852	0.597	-1.7
1853	0.597	-1.7
1854	0.597	-1.7
1855	0.597	-1.7
1856	0.597	-1.7
1857	0.597	-1.7
1858	0.597	-1.7
1859	0.597	-1.7
1860	0.597	-1.7
1861	0.598	-1.7
1862	0.598	-1.7
1863	0.598	-1.7
1864	0.598	-1.7
1865	0.598	-1.7
1866	0.598	-1.7
1867	0.598	-1.7
1868	0.598	-1.7
1869	0.598	-1.7
1870	0.598	-1.7
1871	0.598	-1.7
1872	0.598	-1.7
1873	0.598	-1.7
1874	0.598	-1.7
1875	0.598	-1.7
1876	0.598	-1.7
1877	0.598	-1.7
1878	0.599	-1.7
1879	0.599	-1.7
1880	0.599	-1.7
1881	0.599	-1.7
1882	0.599	-1.7
1883	0.599	-1.7
1884	0.599	-1.7
1885	0.599	-1.7
1886	0.599	-1.7
1887	0.599	-1.7
1888	0.6	-1.7
1889	0.6	-1.7
1890	0.6	-1.7
1891	0.6	-1.7
1892	0.6	-1.7
1893	0.6	-1.7
1894	0.6	-1.7
1895	0.6	-1.7
1896	0.6	-1.7
1897	0.6	-1.7
1898	0.6	-1.7
1899	0.6	-1.7
1900	0.6	-1.7
1901	0.6	-1.7
1902	0.6	-1.7
1903	0.6	-1.7
1904	0.6	-1.7
1905	0.6	-1.7
1906	0.6	-1.7
1907	0.6	-1.7
1908	0.6	-1.7
1909	0.601	-1.7
1910	0.601	-1.7
1911	0.601	-1.7
1912	0.601	-1.7
1913	0.601	-1.7
1914	0.601	-1.7
1915	0.601	-1.7
1916	0.601	-1.7
1917	0.601	-1.7
1918	0.601	-1.7
1919	0.601	-1.7
1920	0.601	-1.7
1921	0.601	-1.7
1922	0.601	-1.7
1923	0.601	-1.7
1924	0.601	-1.7
1925	0.601	-1.7
1926	0.601	-1.7
1927	0.602	-1.7
1928	0.602	-1.7
1929	0.602	-1.7
1930	0.602	-1.7
1931	0.602	-1.7
1932	0.602	-1.7
1933	0.602	-1.7
1934	0.602	-1.7
1935	0.602	-1.7
1936	0.602	-1.7
1937	0.602	-1.7
1938	0.602	-1.7
1939	0.602	-1.7
1940	0.602	-1.7
1941	0.602	-1.7
1942	0.602	-1.7
1943	0.602	-1.7
1944	0.602	-1.7
1945	0.602	-1.7
1946	0.603	-1.7
1947	0.603	-1.7
1948	0.603	-1.6
1949	0.603	-1.6
1950	0.603	-1.6
1951	0.603	-1.6
1952	0.603	-1.6
1953	0.603	-1.6
1954	0.603	-1.6
1955	0.603	-1.6
1956	0.603	-1.6
1957	0.603	-1.6
1958	0.603	-1.6
1959	0.603	-1.6
1960	0.604	-1.6
1961	0.604	-1.6
1962	0.604	-1.6
1963	0.604	-1.6
1964	0.604	-1.6
1965	0.604	-1.6
1966	0.604	-1.6
1967	0.604	-1.6
1968	0.604	-1.6
1969	0.604	-1.6
1970	0.604	-1.6
1971	0.604	-1.6
1972	0.604	-1.6
1973	0.604	-1.6
1974	0.604	-1.6
1975	0.604	-1.6
1976	0.604	-1.6
1977	0.604	-1.6
1978	0.605	-1.6
1979	0.605	-1.6
1980	0.605	-1.6
1981	0.605	-1.6
1982	0.605	-1.6
1983	0.605	-1.6
1984	0.605	-1.6
1985	0.605	-1.6
1986	0.605	-1.6
1987	0.605	-1.6
1988	0.605	-1.6
1989	0.605	-1.6
1990	0.606	-1.6
1991	0.606	-1.6
1992	0.606	-1.6
1993	0.606	-1.6
1994	0.606	-1.6
1995	0.606	-1.6
1996	0.606	-1.6
1997	0.606	-1.6
1998	0.606	-1.6
1999	0.606	-1.6
[truncated: 116,499 more rows]

## Sheet: re-screen
Compound #	% Activity to DMSO	z-score	# compounds with percent activity < 50%	# compounds with z-score < -3	Total Compounds	Z'-factor	Hit-rate (based on % Activity)	Hit-rate (based on stdev values less than 3 of DMSO mean)
1	-0.111431	-5.79563	64	115	237	0.73	0.270042	0.485232
2	-0.0934389	-5.72671
3	-0.080646	-5.6777
4	-0.0345788	-5.50123
5	0.00392654	-5.35373
6	0.0205826	-5.28993
7	0.0289424	-5.2579
8	0.0509183	-5.17372
9	0.0520583	-5.16935
10	0.105826	-4.96338
11	0.113553	-4.93379
12	0.142305	-4.82364
13	0.163395	-4.74286
14	0.168081	-4.7249
15	0.200443	-4.60093
16	0.206206	-4.57886
17	0.20646	-4.57789
18	0.209246	-4.56721
19	0.215959	-4.5415
20	0.237302	-4.45974
21	0.238949	-4.45343
22	0.242812	-4.43863
23	0.255668	-4.38938
24	0.277517	-4.30569
25	0.281507	-4.2904
26	0.28689	-4.26978
27	0.29392	-4.24285
28	0.30304	-4.20792
29	0.31387	-4.16643
30	0.322989	-4.1315
31	0.324193	-4.12689
32	0.331349	-4.09947
33	0.341609	-4.06017
34	0.350792	-4.02499
35	0.351425	-4.02257
36	0.368904	-3.95561
37	0.373401	-3.93838
38	0.376061	-3.92819
39	0.38879	-3.87943
40	0.395503	-3.85372
41	0.39639	-3.85032
42	0.400443	-3.83479
43	0.402977	-3.82509
44	0.40475	-3.8183
45	0.412476	-3.7887
46	0.416023	-3.77511
47	0.429006	-3.72538
48	0.431349	-3.7164
49	0.432742	-3.71106
50	0.434896	-3.70282
51	0.436985	-3.69481
52	0.440722	-3.6805
53	0.441482	-3.67759
54	0.444965	-3.66424
55	0.449652	-3.64629
56	0.457061	-3.61791
57	0.461938	-3.59922
58	0.467384	-3.57836
59	0.469474	-3.57035
60	0.486004	-3.50704
61	0.487967	-3.49951
62	0.493287	-3.47914
63	0.49715	-3.46434
64	0.501583	-3.44736
65	0.50285	-3.4425
66	0.50855	-3.42067
67	0.509816	-3.41582
68	0.519949	-3.377
69	0.520583	-3.37457
70	0.523749	-3.36244
71	0.525016	-3.35759
72	0.525016	-3.35759
73	0.526916	-3.35031
74	0.530082	-3.33818
75	0.530082	-3.33818
76	0.531982	-3.33091
77	0.533249	-3.32605
78	0.533882	-3.32363
79	0.537049	-3.3115
80	0.540849	-3.29694
81	0.543382	-3.28724
82	0.548448	-3.26783
83	0.549715	-3.26298
84	0.550982	-3.25812
85	0.552882	-3.25085
86	0.554148	-3.24599
87	0.557948	-3.23144
88	0.558581	-3.22901
89	0.558581	-3.22901
90	0.559215	-3.22659
91	0.562381	-3.21446
92	0.563015	-3.21203
93	0.564281	-3.20718
94	0.568081	-3.19262
95	0.569981	-3.18534
96	0.574414	-3.16836
97	0.576314	-3.16108
98	0.578847	-3.15138
99	0.579481	-3.14895
100	0.581381	-3.14167
101	0.58518	-3.12712
102	0.58708	-3.11984
103	0.58708	-3.11984
104	0.58898	-3.11256
105	0.58898	-3.11256
106	0.589614	-3.11014
107	0.592147	-3.10043
108	0.593414	-3.09558
109	0.59848	-3.07617
110	0.603547	-3.05676
111	0.60418	-3.05434
112	0.605446	-3.04949
113	0.60798	-3.03978
114	0.61178	-3.02523
115	0.614946	-3.0131
116	0.620646	-2.99126
117	0.621913	-2.98641
118	0.621913	-2.98641
119	0.624446	-2.9767
120	0.625712	-2.97185
121	0.627612	-2.96457
122	0.627612	-2.96457
123	0.628879	-2.95972
124	0.632679	-2.94517
125	0.632679	-2.94517
126	0.633312	-2.94274
127	0.633946	-2.94031
128	0.636479	-2.93061
129	0.639012	-2.92091
130	0.639645	-2.91848
131	0.640279	-2.91605
132	0.642812	-2.90635
133	0.649145	-2.88209
134	0.649778	-2.87966
135	0.651045	-2.87481
136	0.654845	-2.86026
137	0.655478	-2.85783
138	0.655478	-2.85783
139	0.664978	-2.82144
140	0.673211	-2.7899
141	0.673844	-2.78747
142	0.674478	-2.78505
143	0.684611	-2.74623
144	0.687144	-2.73653
145	0.689677	-2.72682
146	0.692844	-2.71469
147	0.692844	-2.71469
148	0.692844	-2.71469
149	0.695377	-2.70499
150	0.69791	-2.69528
151	0.701077	-2.68315
152	0.702977	-2.67588
153	0.70551	-2.66617
154	0.70551	-2.66617
155	0.712476	-2.63949
156	0.718809	-2.61523
157	0.720709	-2.60795
158	0.721976	-2.6031
159	0.725776	-2.58854
160	0.727042	-2.58369
161	0.732109	-2.56428
162	0.732742	-2.56185
163	0.735275	-2.55215
164	0.746675	-2.50848
165	0.749842	-2.49635
166	0.751742	-2.48907
167	0.753642	-2.48179
168	0.754908	-2.47694
169	0.755541	-2.47452
170	0.763141	-2.4454
171	0.775174	-2.39931
172	0.775174	-2.39931
173	0.775807	-2.39688
174	0.782774	-2.3702
175	0.786574	-2.35564
176	0.791007	-2.33866
177	0.794174	-2.32653
178	0.796707	-2.31682
179	0.799873	-2.30469
180	0.80304	-2.29256
181	0.806206	-2.28043
182	0.807473	-2.27558
183	0.808106	-2.27316
184	0.80874	-2.27073
185	0.81444	-2.24889
186	0.815073	-2.24647
187	0.815706	-2.24404
188	0.816339	-2.24162
189	0.818239	-2.23434
190	0.818873	-2.23191
191	0.821406	-2.22221
192	0.823306	-2.21493
193	0.829006	-2.1931
194	0.831539	-2.18339
195	0.842939	-2.13972
196	0.847372	-2.12274
197	0.853705	-2.09848
198	0.859405	-2.07665
199	0.860038	-2.07422
200	0.861305	-2.06937
201	0.865104	-2.05481
202	0.873338	-2.02327
203	0.883471	-1.98446
204	0.88917	-1.96262
205	0.90057	-1.91895
206	0.901837	-1.9141
207	0.906903	-1.89469
208	0.90817	-1.88984
209	0.908803	-1.88742
210	0.909436	-1.88499
211	0.91387	-1.86801
212	0.932236	-1.79765
213	0.936035	-1.7831
214	0.944902	-1.74913
215	0.950602	-1.7273
216	0.953768	-1.71517
217	0.960101	-1.69091
218	0.968334	-1.65937
219	0.982267	-1.606
220	0.987334	-1.58659
221	0.9943	-1.5599
222	1.0019	-1.53079
223	1.01393	-1.48469
224	1.01647	-1.47499
225	1.0228	-1.45073
226	1.02913	-1.42647
227	1.03293	-1.41191
228	1.03927	-1.38765
229	1.0684	-1.27606
230	1.06966	-1.2712
231	1.0798	-1.23239
232	1.10323	-1.14262
233	1.10893	-1.12079
234	1.14693	-0.975227
235	1.18999	-0.810257
236	1.20836	-0.739902
237	1.49652	0.363943

## Sheet: counter-screen(activeCASP10)
Compound #	% Activity to DMSO	z-score	# compounds with percent activity < 50%	# compounds with z-score < -3	Total Compounds	Z'-factor	Hit-rate (based on % Activity)	Hit-rate (based on stdev values less than 3 of DMSO mean)
1	0.00014135	-8.68844	11	78	237	0.73	0.0464135	0.329114
2	0.016204	-8.54886
3	0.0792379	-8.0011
4	0.179863	-7.12669
5	0.331865	-5.80581
6	0.388508	-5.3136
7	0.455188	-4.73416
8	0.472293	-4.58552
9	0.481409	-4.5063
10	0.503226	-4.31671
11	0.508553	-4.27043
12	0.511113	-4.24818
13	0.523507	-4.14048
14	0.527399	-4.10665
15	0.531496	-4.07105
16	0.537437	-4.01943
17	0.54133	-3.9856
18	0.544095	-3.96157
19	0.549216	-3.91707
20	0.555772	-3.8601
21	0.555874	-3.85921
22	0.561098	-3.81382
23	0.561713	-3.80848
24	0.564785	-3.78177
25	0.568678	-3.74795
26	0.57257	-3.71413
27	0.577794	-3.66874
28	0.578306	-3.66428
29	0.585578	-3.60109
30	0.587729	-3.5824
31	0.589368	-3.56816
32	0.590802	-3.5557
33	0.592646	-3.53967
34	0.595104	-3.51831
35	0.59664	-3.50496
36	0.599099	-3.4836
37	0.602479	-3.45423
38	0.605347	-3.4293
39	0.605859	-3.42485
40	0.608624	-3.40082
41	0.610161	-3.38747
42	0.612824	-3.36433
43	0.613234	-3.36077
44	0.616102	-3.33585
45	0.617638	-3.32249
46	0.618253	-3.31715
47	0.619277	-3.30825
48	0.620404	-3.29846
49	0.621223	-3.29134
50	0.624808	-3.26019
51	0.625013	-3.25841
52	0.62614	-3.24862
53	0.626447	-3.24595
54	0.627061	-3.24061
55	0.627164	-3.23972
56	0.62829	-3.22993
57	0.628495	-3.22815
58	0.631261	-3.20411
59	0.631875	-3.19877
60	0.632592	-3.19254
61	0.633924	-3.18097
62	0.635153	-3.17029
63	0.635358	-3.16851
64	0.636792	-3.15605
65	0.636894	-3.15516
66	0.64007	-3.12757
67	0.641811	-3.11244
68	0.641913	-3.11155
69	0.642938	-3.10265
70	0.64304	-3.10176
71	0.644167	-3.09196
72	0.645396	-3.08128
73	0.646113	-3.07505
74	0.646523	-3.07149
75	0.649391	-3.04657
76	0.651951	-3.02432
77	0.652259	-3.02165
78	0.654717	-3.00029
79	0.656151	-2.98783
80	0.656356	-2.98605
81	0.656458	-2.98516
82	0.659531	-2.95845
83	0.659736	-2.95667
84	0.662399	-2.93353
85	0.662604	-2.93175
86	0.664345	-2.91662
87	0.666701	-2.89615
88	0.667725	-2.88725
89	0.668135	-2.88369
90	0.669774	-2.86944
91	0.669978	-2.86766
92	0.670798	-2.86054
93	0.671925	-2.85075
94	0.672437	-2.8463
95	0.675919	-2.81604
96	0.676227	-2.81337
97	0.676534	-2.8107
98	0.677456	-2.80269
99	0.679299	-2.78667
100	0.679504	-2.78489
101	0.681041	-2.77154
102	0.682475	-2.75908
103	0.68268	-2.7573
104	0.683192	-2.75284
105	0.684318	-2.74305
106	0.685138	-2.73593
107	0.685445	-2.73326
108	0.685957	-2.72881
109	0.688723	-2.70478
110	0.688825	-2.70389
111	0.688928	-2.703
112	0.689542	-2.69766
113	0.690054	-2.69321
114	0.690054	-2.69321
115	0.690464	-2.68965
116	0.691488	-2.68075
117	0.693025	-2.6674
118	0.694971	-2.65049
119	0.695176	-2.64871
120	0.698863	-2.61666
121	0.69917	-2.61399
122	0.699478	-2.61132
123	0.69958	-2.61043
124	0.700092	-2.60598
125	0.700912	-2.59886
126	0.701321	-2.5953
127	0.702038	-2.58907
128	0.705009	-2.56326
129	0.705418	-2.5597
130	0.708184	-2.53567
131	0.709311	-2.52587
132	0.709413	-2.52498
133	0.709516	-2.52409
134	0.711666	-2.5054
135	0.712281	-2.50006
136	0.714944	-2.47692
137	0.716788	-2.4609
138	0.71689	-2.46001
139	0.7173	-2.45645
140	0.717607	-2.45378
141	0.718017	-2.45022
142	0.718222	-2.44844
143	0.719349	-2.43865
144	0.719553	-2.43687
145	0.719656	-2.43598
146	0.719963	-2.43331
147	0.719963	-2.43331
148	0.720373	-2.42975
149	0.720578	-2.42797
150	0.720885	-2.4253
151	0.722217	-2.41372
152	0.722319	-2.41283
153	0.722626	-2.41016
154	0.723241	-2.40482
155	0.723548	-2.40215
156	0.723855	-2.39948
157	0.724777	-2.39147
158	0.726826	-2.37367
159	0.727235	-2.37011
160	0.727543	-2.36744
161	0.72785	-2.36477
162	0.728772	-2.35676
163	0.73164	-2.33184
164	0.732664	-2.32294
165	0.737069	-2.28466
166	0.737683	-2.27932
167	0.738195	-2.27487
168	0.738707	-2.27042
169	0.739424	-2.26419
170	0.740653	-2.25351
171	0.740653	-2.25351
172	0.74219	-2.24016
173	0.745058	-2.21524
174	0.745775	-2.20901
175	0.748233	-2.18765
176	0.749155	-2.17963
177	0.74977	-2.17429
178	0.751101	-2.16272
179	0.751613	-2.15827
180	0.751613	-2.15827
181	0.753355	-2.14314
182	0.754174	-2.13602
183	0.756325	-2.11733
184	0.756427	-2.11644
185	0.758681	-2.09686
186	0.759705	-2.08796
187	0.761446	-2.07283
188	0.76749	-2.02031
189	0.768002	-2.01586
190	0.772508	-1.9767
191	0.773942	-1.96424
192	0.77425	-1.96157
193	0.775991	-1.94643
194	0.776503	-1.94198
195	0.778347	-1.92596
196	0.779064	-1.91973
197	0.782956	-1.88591
198	0.784083	-1.87612
199	0.796067	-1.77198
200	0.801495	-1.7248
201	0.802315	-1.71768
202	0.804671	-1.69721
203	0.804876	-1.69543
204	0.807027	-1.67674
205	0.807231	-1.67496
206	0.808256	-1.66606
207	0.810099	-1.65004
208	0.813479	-1.62067
209	0.81604	-1.59841
210	0.817064	-1.58951
211	0.820137	-1.56281
212	0.821059	-1.5548
213	0.823722	-1.53166
214	0.824132	-1.5281
215	0.827717	-1.49694
216	0.829151	-1.48448
217	0.83038	-1.4738
218	0.832326	-1.45689
219	0.833248	-1.44888
220	0.833658	-1.44532
221	0.834477	-1.4382
222	0.834887	-1.43464
223	0.836526	-1.4204
224	0.843081	-1.36343
225	0.846256	-1.33584
226	0.847998	-1.32071
227	0.858855	-1.22636
228	0.866127	-1.16317
229	0.892554	-0.933525
230	0.899519	-0.873
231	0.903616	-0.837397
232	0.906689	-0.810694
233	0.916624	-0.724357
234	0.934242	-0.571263
235	0.952576	-0.411939
236	0.981973	-0.156487
237	0.991601	-0.0728195

## Sheet: SMILES
Compound #	SMILES	Compound #	Compound #	Compound #	Compound #	Compound #	Compound #	Compound #	Compound #	Compound #	Compound #	Compound #	Compound #	Compound #	Compound #	Compound #	Compound #	Compound #	Compound #	Compound #	Compound #	Compound #	Compound #	Compound #	Compound #	Compound #	Compound #	Compound #	Compound #	Compound #	Compound #	Compound #	Compound #	Compound #	Compound #	Compound #	Compound #	Compound #	Compound #	Compound #	Compound #	Compound #	Compound #	Compound #	Compound #	Compound #	Compound #	Compound #	Compound #
1	[NH3+][Pt++]([NH3+])([Cl-])[Cl-]
2	[Cl-].N[Pt](N)(Cl)[N+]1=CC=CC=C1
3	[NH3+][Pt]1([NH3+])OC(=O)C2(CCC2)C(=O)O1
4	CCN(CC)C(=S)SSC(=S)N(CC)CC
5	CCN1C(=O)N(CC(=O)NC2=CC=CC(=C2)C2=CC=C(C)O2)C2=CC=CN=C12
6	COC1=CC(=CC(OC)=C1OC)C(=O)NC1=NC(=CS1)C1=CC=C(C)O1
7	CC(C)CNS(=O)(=O)C1=CC=C2N=C(NC(=O)C3=CN=CC=C3)SC2=C1
8	CC1=CC=C(O1)C1=CSC(NC(=O)C2=CC=C(Br)S2)=N1
9	Cl.CC(C)N(CCC(=O)C1=CC2=CC=CC=C2C=C1)CC1=CC=CC=C1
10	[NH4+].[S-]C(=S)N1CCCC1
11	CC(C)(C)C1=CC=C(C=C1)S(=O)(=O)\C=C\C#N
12	CCOC(=O)C1=C(C)N=C(NC(=O)C2=CC=C3N(CC)C(C)=CC(=O)C3=C2)S1
13	FC1=CC=C(CC(=O)N2CCN(CC2)C2=NN=C(CS2)C2=CC=CC=C2)C=C1
14	CC(=O)N1CCC2=C1C=CC(=C2)S(=O)(=O)NC1=C2C=CC=CC2=C(O)C(SC2=NNC=N2)=C1
15	CCOCC(=O)N1CCN(CC1)C1=NN=C(CS1)C1=CC=CC=C1
16	Cl.CC1=CC(=NO1)C(=O)N1CCN(CC1)C1=NN=C(CS1)C1=CC=CC=C1
17	COC1=C(OC)C=C(CNC(=O)NC2=NC3=C(COC4=CC=CC=C34)S2)C=C1
18	OCCSC1=C(SCCO)C(=O)C2=CC=CC=C2C1=O
19	CN1CCC(\C=C\C2=CC=C(O2)SC2=NC=CC=N2)=CC1
20	O=C(CC1=CC=CS1)N1CCN(CC1)C1=NN=C(CS1)C1=CC=CC=C1
21	CC1=C(NC(=O)CSC2=NC=CC(=N2)N2CCCCC2)C=C(Cl)C=C1
22	O=C(CN1C(=O)CCC1=O)N1CCN(CC1)C1=NN=C(CS1)C1=CC=CC=C1
23	Cl.COC1=NN(C)C=C1C(=O)N1CCN(CC1)C1=NN=C(CS1)C1=CC=CC=C1
24	CN(C)C1=CC=CC(=C1)C(=O)NC1=NC2=CC=C(C=C2S1)S(N)(=O)=O
25	COCC(=O)N1CCN(CC1)C1=NN=C(CS1)C1=CC=CS1
26	CN1C2=NC=CC=C2C(=O)NC11CCN(CC2=CC=CC=C2)CC1
27	NS(=O)(=O)C#CC1=CC=CC=C1
28	Cl.O=C(N1CCN(CC1)C1=NN=C(CS1)C1=CC=CS1)C1=CC2=NSN=C2C=C1
29	I.COC1=CC=C(C=C1)C(=O)NCCN1C=C(SC(N)=N)C2=C1C=CC=C2
30	COC1=CC=C(C=C1)C1=NC=NC(=C1)N1CCC(CC1)C(=O)NC1=CC(Cl)=CC=C1C#N
31	CC1=NN(C(C)=C1)C1=NC(=NC=C1)N1CCC(CC1)C(=O)N1CCN(CC1)C1=NC=CC=C1
32	O=C(CNC(=O)C1=CC=CC=C1)NCC#CCN1CCC2=CC=CC=C2C1
33	CC1=CC(C)=NC(=N1)N1CCC(CNC(=O)C2CCCC2)CC1
34	FC1=CC=C(C=C1F)C(=O)N1CCN=C1SCC1=CC=CC(Cl)=C1
35	OC1=C2C=CC=CC2=C(NS(=O)(=O)C2=CC3=C(NC(=O)CC3)C=C2)C=C1SC1=NNC=N1
36	CC1=CC=C(O1)C1=CSC(NC(=O)C2=CC=C(C=C2)C#N)=N1
37	Cl.FC1=CC=C(SCC(=O)N2CCN(CC2)C2=NN=C(CS2)C2=CC=CS2)C=C1
38	CC(C)N1N=CC2=C1N=CC(NC(=O)C1=CC=C(CN3CCOCC3)C=C1)=C2
39	ClC1=CC=C(C=C1)C1=NN(CCCC(=O)NC2=NC3=C(CCCC3)S2)C(=O)C=C1
40	O=C(NC1=CC2=C(OCCO2)C=C1)C1=CSC(NC2=CC=CC=C2)=N1
41	CC(=O)N(CC1=CC=CO1)C1=NC2=C(S1)C=CC=C2F
42	C(SC1=NN=CN1C1=CC=CC=C1)C1=CC=C(C=C1)N1C=CC=N1
43	FC1=CC=CC=C1N1CCN(CC1)C(=O)CN1N=C2N(C=CN=C2OC2=CC=CC=C2)C1=O
44	COC1=CC=C(CC(=O)N2CCN(CC2)C2=NN=C(CS2)C2=CC=CS2)C=C1
45	CC1=NN(C2=C1C=C(S2)C(=O)NC1=C(C=CC=C1)C(N)=O)C1=CC=CC=C1
46	CCOC(=O)C1=C(NC(=O)C2CCN(CC2)S(C)(=O)=O)SC2=C1CCCCC2
47	ClC1=CC=C(C=C1)C(=O)CSC1=NN=C(NC(=O)C2=NOC(=C2)C2=CC=CO2)S1
48	CC1=CC=C(NC(=O)CN2N=C3N(C=CN=C3SCC3=CC=CC=C3)C2=O)C=C1C
49	CN(C)C1=CC(=CC=C1)C(=O)N1CCN(CC2=NC3=C(N2)C=CC=C3)CC1
50	COC1=CC(=CC=C1)N1C(S)=NN=C1CC1=CC(=O)NC(=O)N1
51	CC1=C(C)C(C(N)=O)=C(NC(=O)COC2=CC=C(C=C2)[N+]([O-])=O)S1
52	FC1=CC=C(C=C1)N1N=CC2=C1N=CN(CCC(=O)N1CCN(CC1)C1=NC=CC=N1)C2=O
53	CC(C)NC(=O)C1=CC=C(O1)C1=C(Cl)C=C(C=C1)[N+]([O-])=O
54	CCOC1=C(CNC(=O)CCC2=NN=C3C=CC(=NN23)C2=CC=CC=C2)C=CC=C1
55	CC1=NC(=C(CCC(=O)NCCC2=CC=C(Cl)C=C2)S1)C1=CC=CS1
56	Cl.CC1=CC(=NO1)C(=O)N1CCN(CC1)C1=NN=C(CS1)C1=CC=CS1
57	CSC1=NC2=CC=CN=C2NC2=C1C=CC=C2
58	CCCCS(=O)(=O)N1CCC2(CC1)NC(=O)N(CCOC1=CC=CC=C1)C2=O
59	NC(=O)CN1CC(C1)C1=NC(=NO1)C1=CC(=CC=C1)C(F)(F)F
60	CC1=CC2=C(N=C(S2)N2CCN(CC2)C(=O)C2=CC=CC=C2)C(C)=C1
61	O=C(CSC1=NN=C(NC(=O)C2=CC=CS2)C=C1)N1CCN(CC1)C1=CC=CC=C1
62	O=C(NC1=CC2=C(OCO2)C=C1)C1=CSC(NC2=CC=CC=C2)=N1
63	NC(=O)CSC1=NC(=C(N)S1)C1=CC=CC=C1
64	NC1=C(N=C(SCC(=O)NC2=CC=C(F)C=C2F)S1)C1=CC=CC=C1
65	CC(C)C(=O)NC1=C(SN=C1C1=CC=CC=N1)C(=O)NCC1=CC=CO1
66	COC1=CC(=CC(OC)=C1)C(=O)NCCC1=CC2=CC=C(C)C=C2NC1=O
67	COC(=O)C1=C(NC(=O)C2=CC=CC=C2F)C2=C(S1)C=CC=C2
68	CC1=CC(=CC=C1)N1C(S)=NN=C1CC1=CC(=O)NC(=O)N1
69	CC1=CC=C(Cl)C=C1N1CCN(CC1)C(=O)CCN1C(=O)NC2=CC=CC=C2C1=O
70	Cl.O=C(N1CCN(CC1)C1=NN=C(CS1)C1=CC=CC=C1)C1=NC2=C(S1)C=CC=C2
71	CN1C(=O)C2=C(N=C1SCC(=O)NC1=C(F)C=CC=C1)C(=CS2)C1=CC=CC=C1
72	CCCNC(=O)C1=CC=C2N(CC(=O)NCC3=CC=C(C)C=C3)C(=O)C=NC2=C1
73	CC1=NN=C(NC(=O)CSC2=NN=C(CCC3=NC4=C(S3)C=CC=C4)O2)S1
74	CC1=CC=C(O1)C1=CSC(NC(=O)C2=CC=C(S2)[N+]([O-])=O)=N1
75	CN1C(=O)C2=C(N=C1SCC(=O)NC1=CC(F)=CC=C1)C(=CS2)C1=CC=CC=C1
76	O=C(NC1=CC=CS1)NC1=CC=C(CC(=O)N2CCOCC2)C=C1
77	COC1=CC=CC(CC(=O)NC2=CC=C(CN3C=NC(=C3)C(=O)NC3=CC=CC=C3)C=C2)=C1
78	CC1=CC=C(C=C1)S(=O)(=O)N1CCOC11CCN(CC1)C(=O)C1=CC=CC(F)=C1
79	COC1=CC=C(C=C1OC)C(=O)N1CCC2(CC1)NC(=O)C1=CC=CC=C1N2
80	COC1=CC=C(C=C1OC)C1=CSC(NC(=O)NC2=CC=CS2)=N1
81	COC1=CC(C(O)CN2CCN(CC2)C2=CC(C)=CC=C2)=C(OC)C=C1
82	COC1=CC=C(C=C1)N1CCN(CC1)C(=O)CC1=CSC(NC2=CC=C(F)C=C2)=N1
83	SC1=NN=C2C=CC(=NN12)C1=CC=C(Br)C=C1
84	COC1=CC=C(C=C1)C1=CN2C(C)=C(SC2=N1)C(=O)NC1=NC=CS1
85	CC1=CC2=C(C=CC=C2)N1CCNC(=O)C1=CC(Cl)=CC=C1
86	CC(=O)NC1=CC=C(SCCCC(=O)NC2CC2)N=N1
87	COC1=CC=C(NC(=O)NC2=NC(CCC(=O)NCC3=C(F)C=CC=C3F)=CS2)C=C1
88	COC1=C(OC)C=C(CCNC(=O)CN2N=C3N(C=CN=C3N3CCOCC3)C2=O)C=C1
89	CN(C)C1=CC=C(CCNC(=O)NC2=CC=CS2)C=C1
90	OC(=O)C(O)=O.O=C(CN1CCN(CC1)C(=O)C1=NC2=C(S1)C=CC=C2)C1=CC=CS1
91	CC1=NN(C(C)=C1)C1=NN=C(C=C1)C(=O)N1CCCC2=CC(C)=CC=C12
92	CCSC1=CC=CC=C1C(=O)NC1=C2CSCC2=NN1CC(=O)NCC1CCCO1
93	CC1=NC2=NC(CSC3=NN=CC(=N3)C3=CC=CC=C3)=CN2C(C)=C1
94	O=C(N1CCC(CC1)N1C=NC2=CC=CN=C12)C1=CC=CO1
95	NC1=C(NC(=O)C2=C(F)C=CC=C2)C(=O)NC(SCC(=O)NC2=NC=CS2)=N1
96	O=C(CSC1=NN=C(CN2C=CC(=O)NC2=O)O1)NC1=CC=C2OCCOC2=C1
97	CC1=C(SN=N1)C(=O)N1CCN(CC1)C1=NC(C)=CC(=N1)N1CCOCC1
98	COCCNC(=O)NC1=NC2=C(CC3=CC=CC=C23)S1
99	CC1=CC(=C(C)O1)C1=NN=C(O1)SCC(=O)NC1=NC2=C(S1)C=C(F)C=C2
100	O=C(N1CCC(CC1)N1C=NC2=CC=CN=C12)C1=CC=CS1
101	COC1=CC(OC)=C(C=C1)N1C(=O)CC(NC2=CC=C(C=C2)N2CCOCC2)C1=O
102	FC1=CC=C(C=C1)N1CCN(CC1)C1=NN=C(SCC(=O)NC2=CC=CC=C2F)S1
103	CC1=NSC(NC(=O)CSC2CCCC2)=C1
104	CC1=NC(C)=C(CC(=O)NC2=NC3=C(CCCC3)S2)S1
105	COCCNC(=O)NCC(O)C1=CC=C(C=C1)C(F)(F)F
106	COC1=CC=C(NC(=O)C2=CSC(NC3=CC=CC=C3)=N2)C=C1OC
107	O=C(CSCC1=CC=CC=C1)N1CCN(CC1)C1=NN=C(CS1)C1=CC=CS1
108	CC1=CC(NC(=O)C(=O)NCC2CCN(CC3=CC=CS3)CC2)=NO1
109	CS(=O)(=O)C1=CC=C(NC2=NC(CC(=O)NC3=CC=C(F)C(Cl)=C3)=CS2)C=C1
110	CS(=O)(=O)N1CCC(CC1)C(=O)NC1=NC2=C(CC3=CC=CC=C23)S1
111	COC1=CC=C(C=C1)N1N=NN=C1CN1CCN(CC1)C(C)=O
112	COC(=O)CC1=CC(SCC(=O)NC2=CC=C(C)C=C2Cl)=NC2=C(N1)C=CC=C2
113	O=C(C1CC1)N1CCN(CC1)C1=NN=C(C=C1)C1=CC=NC=C1
114	COC1=CC=C(NC(=O)NC2=NC(CCC(=O)NCC3=CC=CS3)=CS2)C=C1
115	CC(OC1=CC(C)=CC(C)=C1)C(=O)N1CCN(CC1)C1=NN2C(C)=NN=C2C=C1
116	BrC1=CC=C(C=C1)C1=NN(C(C1)C1=CC=CO1)C(=O)C1=CC=CS1
117	COC1=CC=CC=C1CNC(=O)CCC1=C(N=C(C)S1)C1=CC=CS1
118	[Br-].C(C1=CC=CC=C1)[N+]12CN3CN(CN(C3)C1)C2
119	FC1=CC=C(CNC(=O)NC2=NC3=C(CCC3)S2)C=C1
120	CC1=CC=NC(NC2=NC(CC(=O)NCC3=C(F)C=CC=C3F)=CS2)=C1
121	CSC1=CC=CC(NC(=O)C(=O)NCC2CCN(CC3=CC=CS3)CC2)=C1
122	CN(C)C1=CC(=NC=N1)N1C=NC(=C1)C(=O)NC1=CC(C)=CC(C)=C1
123	CC1CCCCN1C1=NC2=C(CCN(CC3=CC=C4N=CC=NC4=C3)C2)C(=O)N1
124	FC1=CC=CC=C1C(=O)N1CCC(CC1)N1C=NC2=CC=CN=C12
125	CC(C)OC(=O)C1=C(NC2=CC=C(F)C(Cl)=C2)C2=CC=C(C)N=C2N=C1
126	CCSC1=NN=C2C=CC(=NN12)C1=CC=C(Br)C=C1
127	COC1=CC2=C(C=C1OC)C1=NC(C)=NN1C(SCC(=O)NC1=C(OC)C=CC=C1)=N2
128	O=C(NC1=CC=CS1)NC1=CC2=C(CCN2C(=O)C2CCCC2)C=C1
129	CSC1=CC=CC=C1C(=O)N1CCC2=C(C1)SC(NC(=O)C1=CC=CO1)=N2
130	CC1=CC2=C(C=C1)N=C(NC(=O)CSC1=NN=C(O1)C1=CC=CS1)S2
131	CC1CCN(CC1)C(C1=CC=CO1)C1=C(O)N2N=C(C)N=C2S1
132	ClC1=CC=C(S1)C1=CSC(NC(=O)C2=CC=CO2)=N1
133	COC1=CC=CC=C1CN1CCC2=C(C1)C(=O)NC(=N2)N1CCCC(C)C1
134	COC1=CC=C(NC2=NC(=NC3=C2N=NN3)N2CCN(CC2)C2=CC=C(F)C=C2)C=C1
135	CCNC(=O)NC1=NC(=C(C)S1)C1=CC=C(OC)C=C1
136	CS(=O)(=O)C1=CC=C(NC2=NC(CC(=O)NC3=NC4=C(S3)C=CC=C4)=CS2)C=C1
137	[O-][N+](=O)C1=CC=C(C=C1)C(=O)NC1=C(C=CS1)C#N
138	FC1=CC=C(C=C1)C1=NN=C(O1)C1CCN(CC1)C(=O)CC1=CNC2=C1C=CC=C2
139	CCOC(=O)C1=NN(C(=O)C2=C(NC(=O)C3=CC=CS3)SC=C12)C1=C(F)C=CC=C1
140	ClC1=C(CNC(=O)CC2=CSC(SCC(=O)C3=CC=CS3)=N2)C=CC=C1
141	CCOC(=O)C1CCN(CC1)C(=O)CC1=NOC(=C1)C1=CC=C(C)C=C1
142	CCOC(=O)CC1=CSC(NC(=O)CC2=CSC(NC3=CC=CC(Cl)=C3)=N2)=N1
143	CCOC1=CC=C(C=C1)C1=NN2C=CN(CC(=O)NC3=C(C)C(C)=CC=C3)C(=O)C2=C1
144	COC1=C(NC(=O)CN2N=C3C=C(C)N=C(N3C2=O)C2=CC=C(F)C=C2)C=CC=C1
145	CCOC1=CC=C(C=C1)C(=O)NC1=C2CS(=O)CC2=NN1C1=C(C)C(C)=CC=C1
146	Cl.CC(C)N1CCC2=C(C1)SC(NC(=O)C1=CC3=C(O1)C=CC=C3)=C2C1=NC2=C(S1)C=CC=C2
147	COC1=CC=C(C=C1)N1CCN(CC1)S(=O)(=O)CCCNC(=O)CC1=CC=CS1
148	SC1=NN=C(CC2=CC(=O)NC(=O)N2)N1C1=CC=CC=C1
149	O=C(N1CCC(CC1)C1=NN=C(O1)C1CC1)C1=CC=CC=C1C(=O)C1=CC=CC=C1
150	[O-][N+](=O)C1=CC(=CC=C1)C1=NN2C(S)=NN=C2C=C1
151	Cl.O=C(N(CCCN1C=CN=C1)C1=NC2=C(S1)C=CC=C2)C1=CC=CO1
152	COC1=C2NC(=CC2=C(OC)C=C1)C(=O)N1CCN2C(C1)=NN=C2C1CC1
153	O=C(NC1=CC=CS1)NC1=CC2=C(C=C1)N(CCC2)C(=O)C1=CC=CS1
154	CC1=CN2C(C=C1)=NC(C)=C(NC(=O)C1CCCO1)C2=O
155	Cl.FC1=CC(F)=C(C=C1)C(=O)NC1=NC(CN2CCC3=CC=CC=C3C2)=CS1
156	O=C(CSC1=NC(=NS1)C1=CC=CC=C1)N1CCN(CC1)C1=CC=CC=C1
157	CC1=NC(=CN1CC(=O)NC1=CC(Cl)=C(C)C=C1)C1=NOC(=N1)C1=CC(F)=CC=C1
158	CS(=O)(=O)N1CCC(CC1)OC1=NC2=C(S1)C=C(F)C=C2F
159	OCCNC(=O)C1=CC2=CC=CC=C2C(=O)S1
160	CCOC(=O)C1=C(C)C(C#N)=C(NC(=O)C2=CC=NN2C(C)C)S1
161	COC1=CC=C(Cl)C=C1NC(=O)CN1C(C)=NC2=C(SN=C2C2=CC=NC=C2)C1=O
162	CC1=CC=CC2=C1N=C(S2)N1CCN(CC1)C1=C(O)C=CC=C1
163	CCC1=CC=CC(NC(=O)CN2C=CC=C(C3=NC(=NO3)C3=CC=CC=C3C)C2=O)=C1
164	FC(F)(F)CNC(=O)C1CCN(CC1)C(=O)C1=CNC2=CC=CC=C12
165	CCOC(=O)CNC(=O)CN1C=NC2=C(C=NN2C2=C(C)C=CC=C2)C1=O
166	COC1=C(OC)C=C2C3=NC(CCN4C(C)=NC5=C4C=CC=C5)=NN3C(=S)NC2=C1
167	CS(=O)(=O)C1=CC=C(NC2=NC(CC(=O)N3CCC4=C(C3)C=CC=C4)=CS2)C=C1
168	ClC1=C(Cl)C=C(NC(=O)N2CCC3=C(C2)SC(NC(=O)C2=CC=CO2)=N3)C=C1
169	CSC1=CC=CC=C1NC(=O)CC1=CSC(NC2=NC(C)=CC(C)=N2)=N1
170	O=C1OC2(CCCCC2)OC(=O)C1=CNC1=NC(=CS1)C1=CC=CS1
171	CC1=NC(=C(CCC(=O)NC2=CC(F)=CC=C2)S1)C1=CC=CS1
172	COC1=CC=C(CNC(=O)CN2C=NC3=C(CN(CC4=CC=CC=C4)CC3)C2=O)C=C1OC
173	COC1=CC=CC(=C1)C1=NN2C(S)=NN=C2C=C1
174	CCOC(=O)C1=C(NC(=O)CC2NC3=CC=CC=C3NC2=O)SC2=C1CCC(C)C2
175	NC1=C(SC2=C1C(=CC(=N2)C1=CC=CC=C1)C(F)(F)F)C(O)=O
176	CC1=NN=C2C=CC(=NN12)N1CCN(CC1)C(=O)COC1=C(F)C=C(F)C=C1
177	COCCN1CC2=C(C(NC(=O)N2)C2=C(C)C=CC=C2)C1=O
178	CC1=NN(C2CCS(=O)(=O)C2)C(C)=C1CC(=O)NCC1=C(Cl)C=CC=C1
179	COC1=CC=C(C=C1OC)C1=NC(C)=C(CCNC(=O)C2=CC(F)=C(F)C=C2)S1
180	CC(=O)C(SC1=NN=C(N1C1=CC=C(F)C=C1)C1=CNC2=C1C=CC=C2)C(C)=O
181	CC1=CC=CC=C1CN1CCC2=C(C1)C(=O)NC(=N2)N1CCOCC1
182	COC1=C(NC(=O)N2CCC3=C(C2)SC(NC(=O)C2=CC=CO2)=N3)C=CC=C1
183	COC(=O)C1=C(N)SC(C)=C1C1=CC=C(F)C=C1
184	SC1=NN=C(CSC2=NC=CC=N2)N1C1=CC=CC=C1
185	COC(=O)C1=C(NC2=CC(C)=C(Br)C=C2)C2=CC=C(C)N=C2N=C1
186	CC(C)C1=NN=C(O1)C1=CC2=C(C=CC=C2)N1CC(=O)NC1=CC=CC=C1F
187	O=C1C=CC(=NN1CCNS(=O)(=O)C1=CC=CC=C1)C1=CC=CC=C1
188	CC1=CSC2=NC(C)=C(NC(=O)C3=CC(C)=CC(C)=C3)C(=O)N12
189	CC1=CC=CC(=C1)N1CCN(CC1)C(=O)CC1=CSC(NC2=NC=CC=N2)=N1
190	CN1C=C(C=C(NC(=O)C2=CC=CC=C2Cl)C1=O)C(=O)N1CCCC1
191	O=C(COC1=CC2=C(OCO2)C=C1)N1CCN(CC1)C1=NN=C(C=C1)C1=CC=NC=C1
192	COC1=CC=CC=C1NC(=O)CC1=CSC(NC2=NC=CC=N2)=N1
193	CC1CCN(CC1)S(=O)(=O)C1=CN(C)C(=O)N(C)C1=O
194	O=C(NC1=CC=CS1)NC1=C(C=CS1)C#N
195	FC1=C(C=CC=C1)C1=CSC2=C1N=C(NC2=O)N1CCC(CC1)C(=O)NCC=C
196	ClC1=CC(NC(=O)CC2=CSC(NC3=NC=CC=N3)=N2)=CC=C1
197	CC(C)(C)N1N=C2CN(CC2=C1N1C=CC=C1)C(=O)C1=CC=CS1
198	CC1=NC2=C(C=NN2C(S)=C1)C1=CC=CC=C1
199	CCC1=NC=CN1S(=O)(=O)C1=CC=C(OC)C(C)=C1
200	CCOC(=O)C1=C(NCC2=CC=CS2)C2=CC=CC(Cl)=C2NC1=O
201	O=C(CC1=CSC(NC2=NC=CC=N2)=N1)NC1=NC(=CS1)C1=CN=CC=C1
202	CC1=NC(=C(CCC(=O)NC2=C(C)C=CC(Cl)=C2)S1)C1=CC=CS1
203	CC(N1N=C(C=CC1=O)C1=CC=CO1)C(=O)NC1=NC(C)=CS1
204	O=C(NC1=CC=CS1)N1CCN(CC1)C1=NC=NC(=C1)N1CCOCC1
205	OC(=O)C1=NNC(=C1)C1=C(F)C=CC=C1
206	NC(=O)C1=CC=CC2=NC3=C(C=CC=C3)N=C12
207	CC1=NSC(NC(=O)CSCC2=CC=CC=C2)=C1
208	O=C(NCC1(CCOCC1)C1=CC=CS1)NC1=CC=CS1
209	COC1=C(Cl)C=C(NC(=O)C2=CSC(NC3=NC=CC=N3)=N2)C=C1
210	COC1=CC=C(Cl)C=C1NC(=O)C1CCN(CC1)C1=CC=C(N=N1)C1=CC=CN=C1
211	O=C(CC1=CNC2=C1C=CC=C2)NC1=C2CSCC2=NO1
212	NC1=C(NC(=O)C2=CC=CC=C2)C(=O)NC(SCC(=O)NC2=CC(=CC=C2)[N+]([O-])=O)=N1
213	COC1=CC=C(Cl)C=C1C(=O)NC1=CC(=NN1C1=NC(C)=CC(=O)N1)C1=CC=CO1
214	CSC1=CC=CC(=C1)N1C=CC(=O)C(=N1)C1=NC(=NO1)C1=CC(Cl)=C(F)C=C1
215	COC1=CC(=CC2=C1N=C(NC(=O)C1CCCCC1)S2)[N+]([O-])=O
216	FC(F)(F)C1=CC=CC=C1NS(=O)(=O)C1CC1
217	CC1=CC=C(C=C1C)N1N=C2CSCC2=C1NC(=O)CN1C(=O)OC2=C1C=CC=C2
218	NC(=O)C1=C(NC(=O)C2=C(Cl)SC(Cl)=C2)SC2=C1CCCCC2
219	CN1CCN(CC1)C(=O)N(CC1=CC=C(Cl)C=C1Cl)S(=O)(=O)C1=CC=C(C)C=C1
220	OC(=O)C(O)=O.FC1=CC=C(C=C1)C1=NNC(=C1)C(=O)N1CCN(CC(=O)C2=CC=CS2)CC1
221	CCC1=CC(=O)NC(=N1)N1N=C(C=C1NC(=O)C1C2=C(OC3=C1C=CC=C3)C=CC=C2)C1=CC=CO1
222	CN1C2=C(OCC(C)(C)C1=O)C=C(N)C=C2
223	FC1=CC(=CC=C1)C(=O)NC1=CC=CC(=C1)C1=CC=C(N=N1)N1CCCCC1
224	CCC1=C(C)N=C(NC1=O)SCC(=O)N1CC(C)OC(C)C1
225	O=S(=O)(NC1=CC=C(C=C1)N1CCCCS1(=O)=O)C1=C2C=CC=CC2=CC=C1
226	C\C=C\C1=CC=C2OCOC2=C1
227	CC1=CC=C(C=C1)S(=O)(=O)\C=C\C#N
228	[H][C@@]12CC[C@H](C(C)=O)[C@@]1(C)CC[C@@]1([H])[C@@]2([H])CC=C2C[C@@H](O)CC[C@]12C
229	CC(C)CC(NC(=O)[C@H](C)NC(=O)C[C@H](O)C(CC(C)C)NC(=O)[C@@H](NC(=O)C(NC(=O)CC(C)C)C(C)C)C(C)C)[C@@H](O)CC(O)=O
230	C[C@]12CC[C@H]3[C@@H](CC(=C)C4=CC(=O)C=C[C@]34C)[C@@H]1CCC2=O
231	[H][C@]12N=C(\C(C)=C3/N=C(/C=C4\N=C(\C(\C)=C5\[C@@H](CCC(N)=O)[C@](C)(CC(N)=O)[C@@]1(C)N5[Co+]C#N)[C@@](C)(CC(N)=O)[C@@H]4CCC(N)=O)C(C)(C)[C@@H]3CCC(N)=O)[C@](C)(CCC(=O)NC[C@@H](C)OP([O-])(=O)O[C@@H]1[C@@H](CO)O[C@@H]([C@@H]1O)N1C=NC3=C1C=C(C)C(C)=C3)[C@H]2CC(N)=O
232	NC1=NC(=CS1)C(=N\O)\C(=O)N[C@H]1[C@H]2SCC(C=C)=C(N2C1=O)C(O)=O
233	[Na+].[Na+].[Na+].[Na+].COC1=C(C=CC(=C1)C1=CC(OC)=C(C=C1)\N=N\C1=C(O)C2=C(N)C(=CC(=C2C=C1)S([O-])(=O)=O)S([O-])(=O)=O)\N=N\C1=C(O)C2=C(N)C(=CC(=C2C=C1)S([O-])(=O)=O)S([O-])(=O)=O
234	COC1=CC=CC=C1CN(CC1=CC2=CC=C(C)C(C)=C2N=C1Cl)C(C)=O
235	CCOC1=CC=C2N=C(NCCNC(=O)C3=C(Cl)C=CC=C3)C(=CC2=C1)C#N
236	NC1=C2N=C(NC2=NC=N1)SCC(=O)N1CCC2=C(C1)C=CC=C2
237	CC1(C)OC2=CC=C(C=C2NC1=O)C(=O)N\N=C\C1=CC=CC=C1
[truncated: 5,000 more columns]
